# Supplementary material for: Enantioselective Michael addition of malononitrile to chalcones catalyzed by a simple quinine–Al(OiPr)3 complex: a simple method for the synthesis of a chiral 4H-pyran derivative
Source: Royal Society of Chemistry journal article supplement (doi:10.1039/b908632c), 2009-01-01
Supplement: b908632c.pdf [file b908632c.pdf]

# Enantioselective Michael Addition of Malononitrile to Chalcone Catalyzed by Simple Quinine-Al(OiPr)<sub>3</sub> Complex: a Simple Method for the Synthesis of Chiral 4-(H)-Pyran Derivative

Jian Shi, Min Wang, Ling He, Ke Zheng, Xiaohua Liu, Lili Lin and Xiaoming Feng\*

*†Key Laboratory of Green Chemistry & Technology, Ministry of Education, College of Chemistry, Sichuan University, Chengdu 610064, P. R. China*

## CONTENTS:

|                                                                                  |     |
|----------------------------------------------------------------------------------|-----|
| (A) General .....                                                                | S2  |
| (B) General procedure for chiral catalyst preparation .....                      | S2  |
| (C) General procedure for the synthesis of enones .....                          | S2  |
| (D) General Procedure for the Asymmetric Catalytic Michael Reaction .....        | S2  |
| (E) General procedure for the synthesis of 4-(H)-pyran derivations .....         | S2  |
| (F) Optimization of conditions .....                                             | S3  |
| (G) The analytical and spectral characterization data of reaction products ..... | S5  |
| (H) Copies of NMR Spectra for New Compounds .....                                | S19 |
| (I) References .....                                                             | S38 |

### **(A) General**

<sup>1</sup>H NMR spectra were recorded on commercial instruments (400 MHz). Chemical shifts are recorded in ppm relative to tetramethylsilane and with the solvent resonance as the internal standard. Data are reported as follows: chemical shift, multiplicity (s = singlet, d = doublet, t = triplet, m = multiplet, br = broad), coupling constants (Hz), integration. <sup>13</sup>C NMR data were collected on commercial instruments (100 MHz) with complete proton decoupling. Chemical shifts are reported in ppm from the tetramethylsilane with the solvent resonance as internal standard. Enantiomer excesses were determined by chiral HPLC analysis on Daicel Chiralcel AS-H/ IA/IB in comparison with the authentic racemates. Optical rotations were reported as follows:  $[\alpha]_D^{20}$  (c: g/100 mL, in solvent,  $\lambda = 589$  nm). HRMS was recorded on a commercial apparatus (ESI Source). All the solvents were purified by usual methods before use.

### **(B) General procedure for chiral catalyst preparation**

All of the alkaloids and metal reagents are commercially available.

### **(C) General procedure for the synthesis of enones (2a-2v)**

The aldehyde (10 mmol) was added gradually to a solution of NaOH (0.5 g) in H<sub>2</sub>O (10.0 mL) and ketone (10 mmol) in ethanol (15 mL) at 0 °C. The mixture was then allowed to warm to room temperature and stirred for overnight. At the end of this period, KHSO<sub>4</sub> (1 N) solution was added to the flask until PH  $\approx$  6, followed by extraction with ether. The combined organic layers were dried over Na<sub>2</sub>SO<sub>4</sub> and concentrated to give a solid which was purified by flash column chromatography using EtOAc–hexanes at last.<sup>1</sup> All spectroscopic data of the enones were identical to those reported in the literature.<sup>2</sup>

### **(D) General Procedure for the Asymmetric Catalytic Michael Reaction (3a-3v)**

Al(O<sup>*i*</sup>Pr)<sub>3</sub> (0.01 mmol) was added to a dry reaction tube containing a suspension of quinine (3.2 mg, 0.01 mmol), chalcone (20.8 mg, 0.1 mmol) and 0.06 mL dry toluene. The mixture was stirred at 25 °C for 1 h to give a solution under nitrogen atmosphere. Then malononitrile (6.9 mg, 0.105 mmol) dissolved in toluene (0.4 mL) (if required, heated the toluene solvent) was added at 0 °C. After being stirred for 80 h, the reaction mixture was directly purified by column chromatography on silica gel eluted (ethyl acetate: petroleum ether = 1:5) to afford the corresponding compound.

### **(E) General procedure for the synthesis of 4-(H)-pyran derivative**

2-(3-Oxo-1,3-diphenylpropyl)malononitrile (0.274 mg, 1 mmol) was added in dry ethanol (5 mL), then piperidine (1.0 mL) was added. The resulting solution was stirred at 30 °C for 48 h. Following, the solvent was removed. The reaction mixture was directly purified by column chromatography on silica gel eluted (CH<sub>2</sub>Cl<sub>2</sub>: petroleum ether = 1:2) to afford the corresponding compound.<sup>3</sup>



| Entry | Catalyst                   | Solvent                         | Yield <sup>b</sup> (%) | Ee <sup>c</sup> (%) |
|-------|----------------------------|---------------------------------|------------------------|---------------------|
| 1     | 1b + Al(OiPr) <sub>3</sub> | CH <sub>2</sub> Cl <sub>2</sub> | 75                     | 77                  |
| 2     | 1b + Al(OiPr) <sub>3</sub> | Et <sub>2</sub> O               | 66                     | 29                  |
| 3     | 1b + Al(OiPr) <sub>3</sub> | CHCl <sub>3</sub>               | 41                     | 51                  |
| 4     | 1b + Al(OiPr) <sub>3</sub> | THF                             | 55                     | 15                  |
| 5     | 1b + Al(OiPr) <sub>3</sub> | MeOH                            | 69                     | race                |
| 6     | 1b + Al(OiPr) <sub>3</sub> | cyclohexane                     | 43                     | 19                  |
| 7     | 1b + Al(OiPr) <sub>3</sub> | toluene                         | 92                     | 90                  |
| 8     | 1b + Al(OiPr) <sub>3</sub> | o-xylene                        | 90                     | 89                  |

<sup>a</sup> Unless noted otherwise, the reaction was carried out with **1b** (0.01 mmol), metal (0.01 mmol), **2a** (0.1 mmol) and malononitrile (0.105 mmol) in solvent (1.0 mL) at 0 °C under nitrogen for 80 h. <sup>b</sup> Isolated yield. <sup>c</sup> Determined by chiral HPLC.

#### Optimization of the ratio between ligand and metal

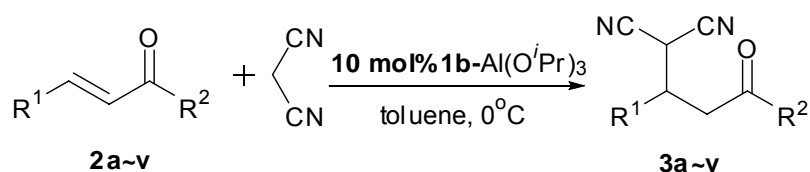

| Entry <sup>a</sup> | Ligand/metal | Yield <sup>b</sup> (%) | Ee <sup>c</sup> (%) |
|--------------------|--------------|------------------------|---------------------|
| 1                  | 2:1          | 90                     | 83                  |
| 2                  | 1:2          | 93                     | 87                  |
| 3                  | 1:0          | 51                     | 80                  |
| 4                  | 1:1          | 92                     | 90                  |

<sup>a</sup> Unless noted otherwise, the reaction was carried out with **2a** (0.1 mmol) under nitrogen at 25 °C for 1 h, then malononitrile (0.105 mmol) in toluene (1.0 mL) at 0 °C for 80 h. <sup>b</sup> Isolated yield. <sup>d</sup> Determined by chiral HPLC.

#### Optimization of additive

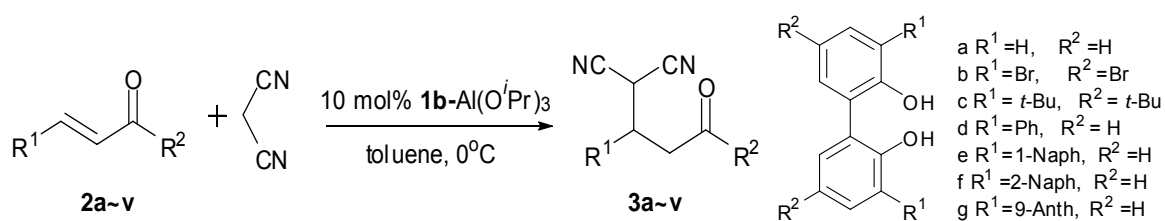

| Entry <sup>a</sup> | Additive                   | Yield <sup>b</sup> (%) | Ee <sup>c</sup> (%) |
|--------------------|----------------------------|------------------------|---------------------|
| 1                  | a                          | 71                     | 85                  |
| 2                  | b                          | 67                     | 86                  |
| 3                  | c                          | 74                     | 85                  |
| 4                  | d                          | 73                     | 86                  |
| 5                  | f                          | 77                     | 86                  |
| 6                  | g                          | 76                     | 85                  |
| 7                  | h                          | 70                     | 85                  |
| 8                  | R-binol                    | 70                     | 72                  |
| 9                  | S-binol                    | 73                     | -62                 |
| 10                 | <i>o</i> -dihydroxybenzene | 81                     | 86                  |
| 11                 | <i>m</i> -dihydroxybenzene | 80                     | 84                  |
| 12                 | <i>p</i> -dihydroxybenzene | 78                     | 84                  |
| 13                 | triethylanmine             | 92                     | 77                  |
| 14                 | 3 Å MS                     | 85                     | 88                  |
| 15                 | 4 Å MS                     | 87                     | 88                  |
| 16                 | 5 Å MS                     | 87                     | 88                  |

<sup>a</sup> Unless noted otherwise, the reaction was carried out with **1b** (0.01 mmol), Al(O<sup>i</sup>Pr)<sub>3</sub> (0.01 mmol), **2a** (0.1 mmol) and additive (entries 1-13, 0.01 mmol, entries 14-16, 10 mg) and malononitrile (0.105 mmol) in toluene (1.0 mL) at 0 °C under nitrogen for 80 h. <sup>b</sup> Isolated yield. <sup>c</sup> Determined by chiral HPLC

## (G) The analytical and spectral characterization data of reaction products

### 2-(3-Oxo-1, 3-diphenylpropyl)malononitrile (**3a**)

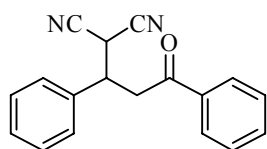

white solid; 92% yield, 90% ee;  $[\alpha]_D^{20} = -12.59$  (*c* 0.270 in CH<sub>2</sub>Cl<sub>2</sub>); HPLC DAICEL CHIRALCEL IA, 2-propanol/*n*-hexane = 10/90, flow rate = 1.0 mL/min,  $\lambda = 254$  nm, retention time: 18.711 min (major) and 15.203 min (minor); <sup>1</sup>H NMR (400 MHz, CDCl<sub>3</sub>)  $\delta$  3.69 (2H, m, O=C-CH<sub>2</sub>), 3.96 (1H, dt,  $J_1 = 5.2$  Hz,  $J_2 = 8.4$  Hz, Ar-CH), 4.61 (1H, d,  $J = 5.2$  Hz, NC-CH), 7.39-7.83 (10H, m, Ar-H) ppm.

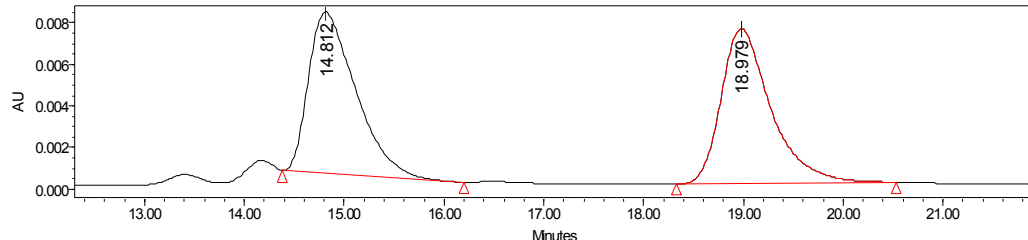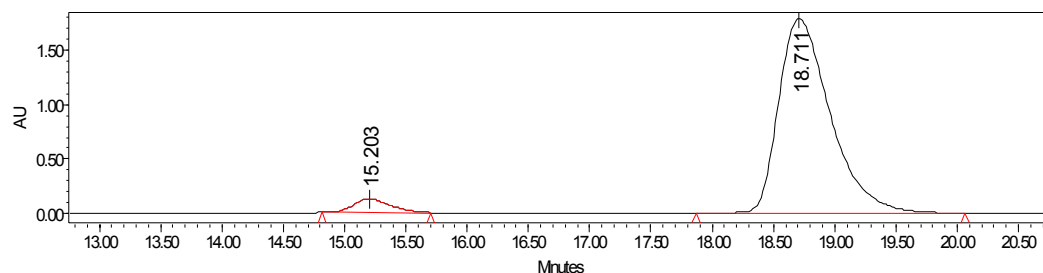

### 2-(1-(4-Fluorophenyl)-3-Oxo-3-phenylpropyl)malononitrile (**3b**)

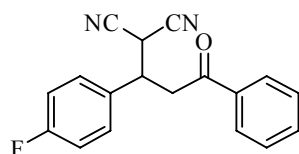

white solid; 94% yield, 89% ee;  $[\alpha]_D^{20} = -5.56$  (*c* 0.288 in CH<sub>2</sub>Cl<sub>2</sub>); HPLC DAICEL CHIRALCEL AS-H, 2-propanol/*n*-hexane = 20/80, flow rate = 1.0 mL/min,  $\lambda = 254$  nm, retention time: 37.447 min (major) and 29.335 min (minor);

$^1\text{H}$  NMR (400 MHz,  $\text{CDCl}_3$ ),  $\delta$  3.66 (2H, m,  $\text{O}=\text{C}-\text{CH}_2$ ), 3.96 (1H, dt,  $J_1 = 5.2$  Hz,  $J_2 = 8.4$  Hz, Ar-CH), 5.34 (1H, d,  $J = 4.8$  Hz, NC-CH), 7.11-7.96 (9H, m, Ar-H) ppm.

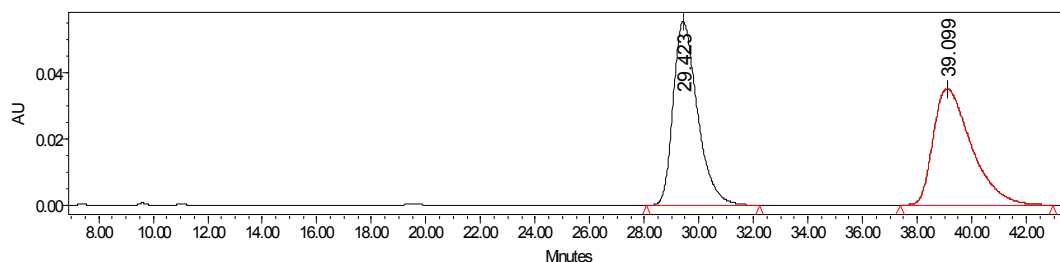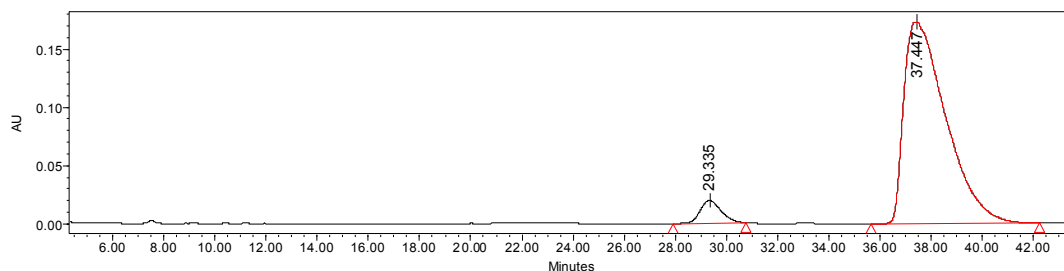

### 2-(1-(3-Chlorophenyl)-3-Oxo-3-phenylpropyl)malononitrile (3c)

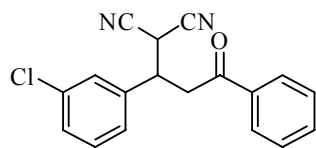

white solid; 92% yield, 87% ee;  $[\alpha]_{\text{D}}^{20} = -13.48$  ( $c$  0.178 in  $\text{CH}_2\text{Cl}_2$ ). HPLC DAICEL CHIRALCEL AS-H, 2-propanol/ $n$ -hexane = 20/80, flow rate = 1.0 mL/min,  $\lambda = 254$  nm, retention time: 19.506 min (major) and 15.801 min (minor);  $^1\text{H}$  NMR (400 MHz,  $\text{CDCl}_3$ )  $\delta$  3.66 (2H, m,  $\text{O}=\text{C}-\text{CH}_2$ ), 3.94 (1H, dt,  $J_1 = 5.2$  Hz,  $J_2 = 8.4$  Hz, Ar-CH), 4.68 (1H, d,  $J = 4.8$  Hz, Ar-CH), 7.35-7.98 (9H, m, Ar-H) ppm;  $^{13}\text{C}$  NMR (100 MHz,  $\text{CDCl}_3$ )  $\delta$  28.5, 39.9, 40.8, 111.4, 111.5, 126.3, 128.1, 128.2, 128.9, 129.5, 130.6, 134.3, 135.2, 135.6, 138.4, 196.2 ppm; HRMS (ESI-TOF) calcd for  $\text{C}_{18}\text{H}_{13}\text{ClN}_2\text{O}$  ( $[\text{M}-\text{H}]^+$ ) = 307.0643, Found 307.0638.

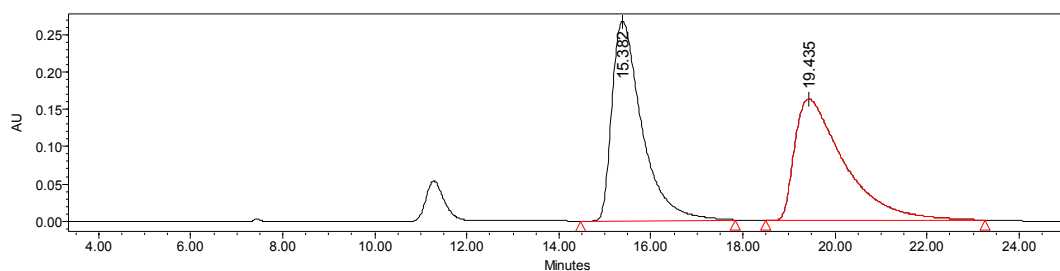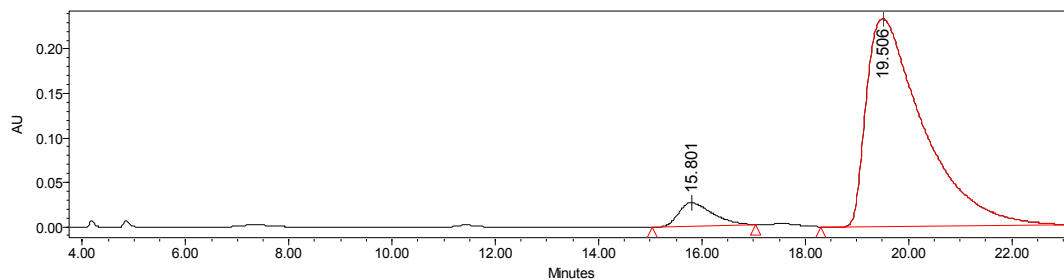

### 2-(1-(4-Chlorophenyl)-3-Oxo-3-phenylpropyl)malononitrile (3d)

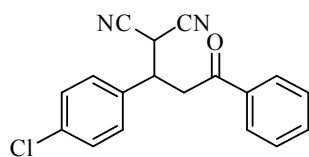

white solid; 89% yield, 89% ee;  $[\alpha]_D^{20} = -5.15$  (*c* 0.194 in  $\text{CH}_2\text{Cl}_2$ ); HPLC DAICEL CHIRALCEL IA, 2-propanol/*n*-hexane = 5/95, flow rate = 1.0 mL/min,  $\lambda = 254$  nm, retention time: 51.273 min (major) and 35.773 min (minor);  $^1\text{H}$  NMR (400 MHz,  $\text{CDCl}_3$ )  $\delta$  3.65 (2H, m,  $\text{O}=\text{C}-\text{CH}_2$ ), 3.95 (1H, dt,  $J_1 = 5.2$  Hz,  $J_2 = 8.8$  Hz, Ar-CH), 4.31 (1H, d,  $J = 5.2$  Hz, NC-CH), 7.38-7.97 (9H, m, Ar-H) ppm;  $^{13}\text{C}$  NMR (100 MHz,  $\text{CDCl}_3$ )  $\delta$  27.1, 36.7, 39.2, 111.1, 111.5, 128.13, 128.19, 128.8, 129.0, 130.4, 132.7, 134.3, 134.9, 135.5, 195.6 ppm; HRMS (ESI-TOF) calcd for  $\text{C}_{18}\text{H}_{13}\text{ClN}_2\text{O}$  ( $[\text{M}-\text{H}^+]$ ) = 307.0643, Found 307.0641.

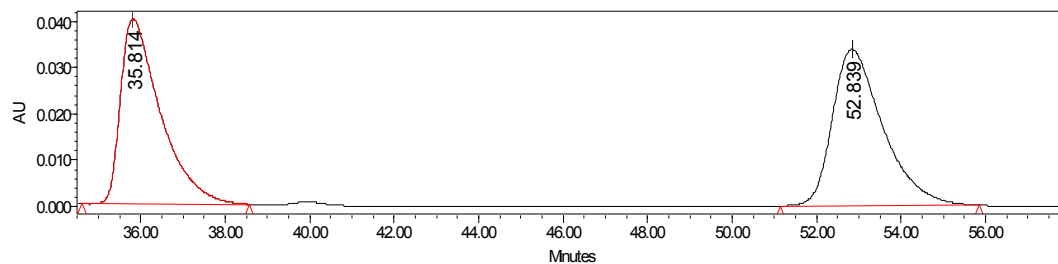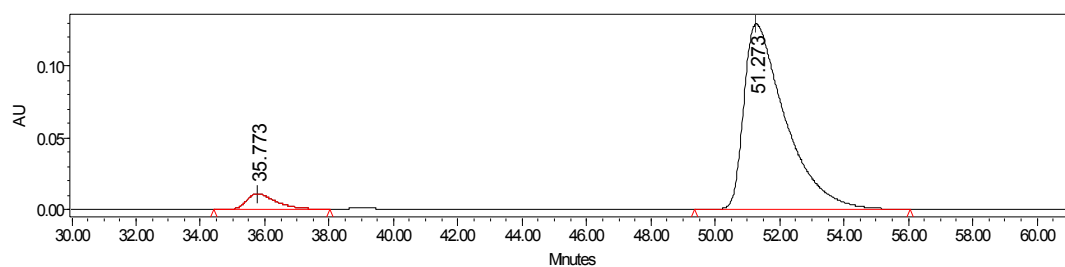

### 2-(1-(2,4-Dichlorophenyl)-3-Oxo-3-phenylpropyl)malononitrile (3e)

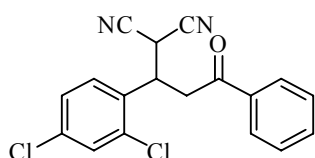

white solid; 90% yield, 89% ee;  $[\alpha]_D^{20} = 10.34$  (*c* 0.232 in  $\text{CH}_2\text{Cl}_2$ ); HPLC DAICEL CHIRALCEL AS-H, 2-propanol/*n*-hexane = 10/90, flow rate = 1.0 mL/min,  $\lambda = 254$  nm, retention time: 21.232 min (major) and 19.240 min (minor);  $^1\text{H}$  NMR (400 MHz,  $\text{CDCl}_3$ )  $\delta$  3.70 (2H, m,  $\text{O}=\text{C}-\text{CH}_2$ ), 4.63 (2H, m, Ar-CH and NC-CH), 7.31-7.969 (8H, m, Ar-H) ppm;  $^{13}\text{C}$  NMR (100 MHz,  $\text{CDCl}_3$ )  $\delta$  27.1, 36.7, 39.2, 111.1, 111.5, 128.13, 128.19, 128.8, 129.0, 130.4, 132.3, 134.9, 135.5, 195.6 ppm; HRMS (ESI-TOF) calcd for  $\text{C}_{18}\text{H}_{12}\text{Cl}_2\text{N}_2\text{O}$  ( $[\text{M}-\text{H}^+]$ ) = 341.0254, Found 341.0256.

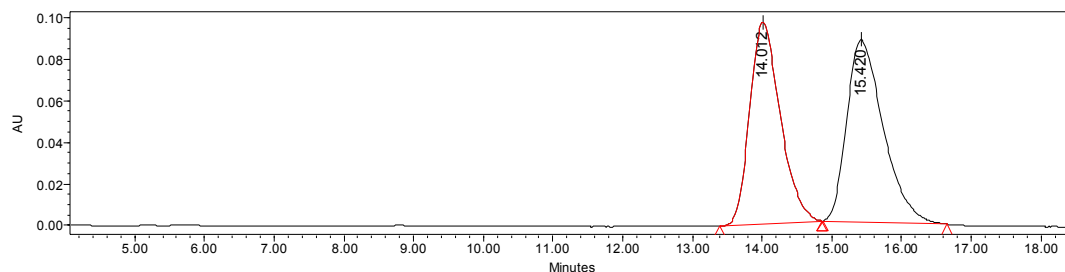

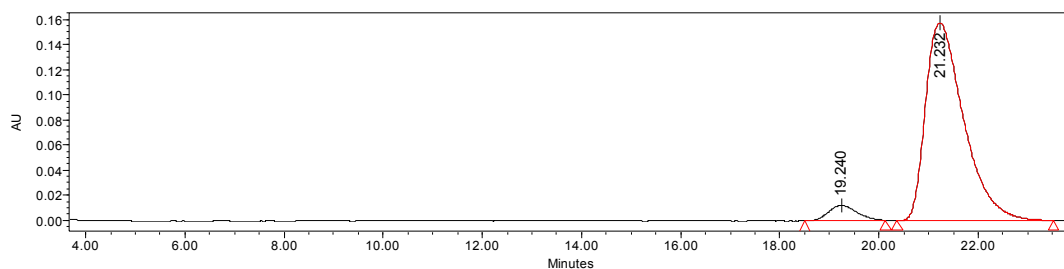

### 2-(1-(4-Cyanophenyl)-3-Oxo-3-phenylpropyl)malononitrile (3f)

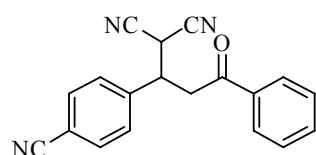

white solid; 93% yield, 89% ee;  $[\alpha]_D^{20} = -5.88$  (*c* 0.170 in  $\text{CH}_2\text{Cl}_2$ ); HPLC DAICEL CHIRALCEL IA, 2-propanol/*n*-hexane = 25/75, flow rate = 1.0 mL/min,  $\lambda = 254$  nm, retention time: 17.205 min (major) and 13.533 min (minor);  $^1\text{H}$  NMR (400 MHz,  $\text{CDCl}_3$ )  $\delta$  3.68 (2H, m,  $\text{O}=\text{C}-\text{CH}_2$ ), 4.03 (1H, dt,  $J_1 = 5.2$  Hz,  $J_2 = 8.4$  Hz, Ar-CH), 4.66 (1H, d,  $J = 5.2$  Hz, NC-CH), 7.49-7.97 (9H, m, Ar-H) ppm;  $^{13}\text{C}$  NMR (100 MHz,  $\text{CDCl}_3$ )  $\delta$  28.3, 39.6, 41.1, 111.1, 111.3, 113.3, 118.0, 128.1, 129.04, 129.05, 133.1, 134.5, 135.4, 141.4, 195.8 ppm; HRMS (ESI-TOF) calcd for  $\text{C}_{19}\text{H}_{13}\text{N}_3\text{O}$  ( $[\text{M}-\text{H}^+]$ ) = 298.0986, Found 298.0980.

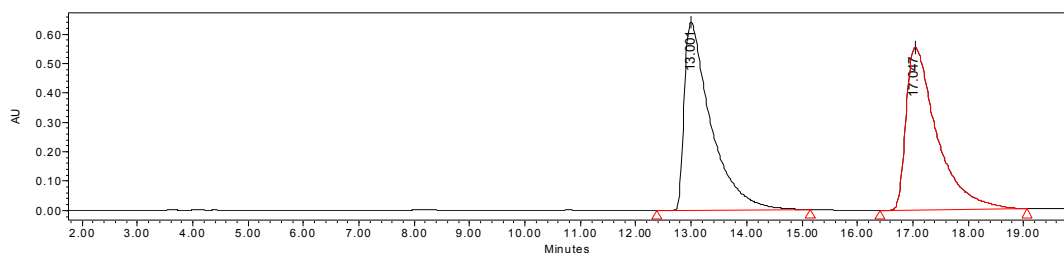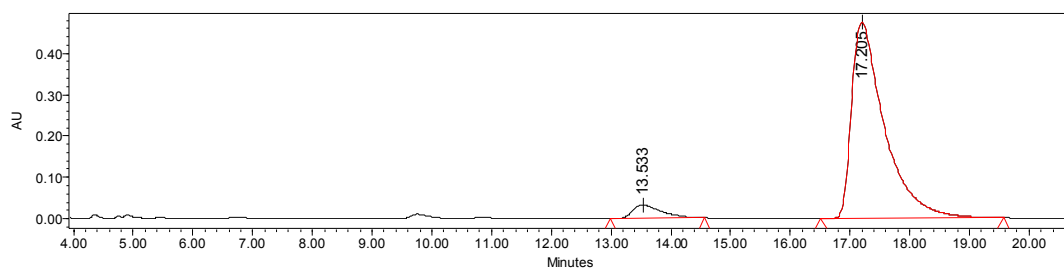

### 2-(1-(4-Nitrophenyl)-3-Oxo-3-phenylpropyl)malononitrile (3g)

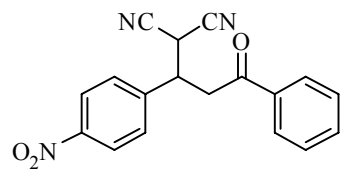

white solid; 95% yield, 89% ee;  $[\alpha]_D^{20} = -7.14$  (*c* 0.042 in  $\text{CH}_2\text{Cl}_2$ ); HPLC DAICEL CHIRALCEL IA, 2-propanol/*n*-hexane = 25/75, flow rate = 1.0 mL/min,  $\lambda = 210$  nm, retention time: 19.586 min (major) and 14.162 min (minor);  $^1\text{H}$  NMR (400 MHz,  $\text{CDCl}_3$ )  $\delta$  3.71 (2H, m,  $\text{O}=\text{C}-\text{CH}_2$ ), 4.10 (1H, dt,  $J_1 = 5.6$  Hz,  $J_2 = 8.4$  Hz, Ar-CH), 4.69 (1H, d,  $J = 4.8$  Hz, NC-CH), 7.50-7.96 (9H, m, Ar-H) ppm.



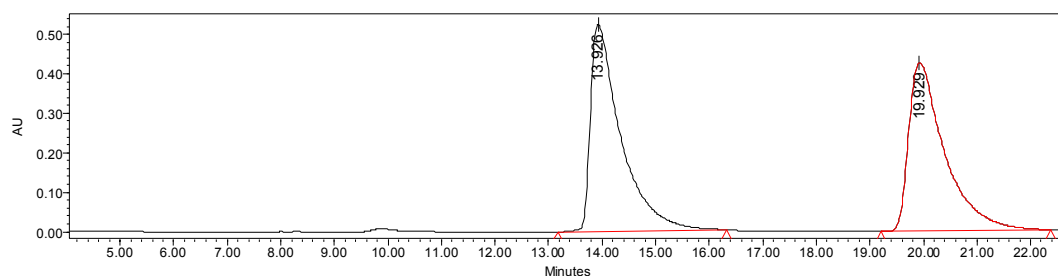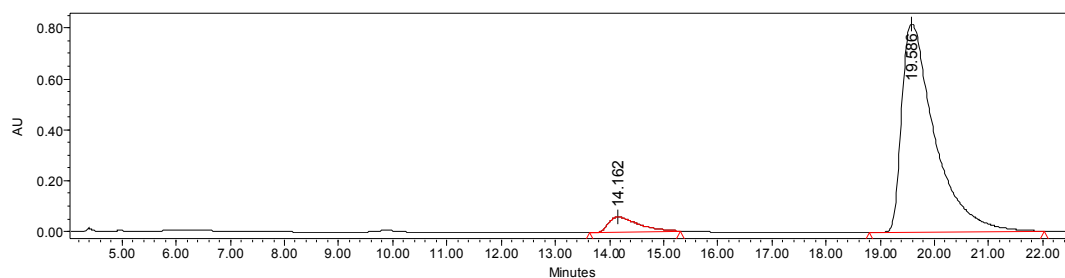

### 2-(Z-1-styrene-3-Oxo-1,3-phenylpropyl)malononitrile (3i)

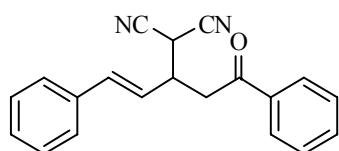

colorless liquid; 94% yield, 87% ee;  $[\alpha]_D^{20} = -0.65$  (*c* 0.154 in  $\text{CH}_2\text{Cl}_2$ ). HPLC DAICEL CHIRALCEL IA, 2-propanol/*n*-hexane = 15/85, flow rate = 1.0 mL/min,  $\lambda = 254$  nm, retention time: 14.684 min (major) and 11.622 min (minor);  $^1\text{H}$  NMR (400 MHz,  $\text{CDCl}_3$ )  $\delta$  3.45 (2H, m,  $\text{OC}=\text{CH}_2$ ), 3.57 (1H, m,  $\text{C}=\text{CH}-\text{CH}$ ), 4.60 (1H, d,  $J = 4.4$  Hz,  $\text{OC}=\text{CH}_2$ ), 6.26 (1H, dd,  $J_1 = 9.2$  Hz,  $J_2 = 15.6$  Hz,  $\text{Ar}-\text{CH}=\text{CH}$ ), 6.81 (1H, d,  $J = 15.6$  Hz,  $\text{Ar}-\text{CH}=\text{CH}$ ), 7.30-8.00 (10H, m, Ar-H) ppm;  $^{13}\text{C}$  NMR (100 MHz,  $\text{CDCl}_3$ )  $\delta$  27.5, 39.6, 40.0, 111.6, 112.0, 123.3, 126.8, 127.5, 128.6, 128.7, 128.9, 129.0, 134.2, 135.3, 135.8, 136.3, 196.7 ppm; HRMS (ESI-TOF) calcd for  $\text{C}_{20}\text{H}_{16}\text{N}_2\text{O}$  ( $[\text{M}-\text{H}]^+$ ) = 299.1190, Found 299.1186.

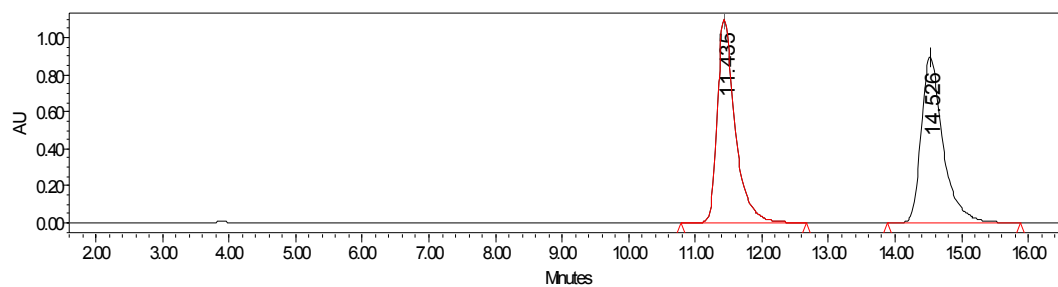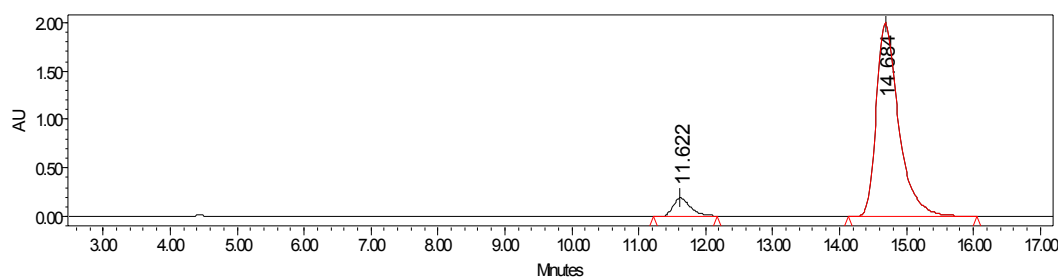

### 2-(1-(3, 4-Methylenedioxyphenyl)-3-Oxo-3-phenylpropyl)malononitrile (3h)

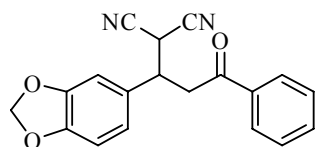

white solid; 91% yield, 88% ee;  $[\alpha]_D^{20} = -11.20$  (*c* 0.116 in  $\text{CH}_2\text{Cl}_2$ ); HPLC DAICEL CHIRALCEL IA, 2-propanol/*n*-hexane = 25/75, flow rate = 1.0 mL/min,  $\lambda = 254$  nm, retention time: 19.586 min (major) and 14.160 min (minor);  $^1\text{H}$  NMR (400 MHz,  $\text{CDCl}_3$ )  $\delta$  3.65 (2H, m, O=C-CH<sub>2</sub>), 3.90 (1H, dt,  $J_1 = 4.8$  Hz,  $J_2 = 8.4$  Hz, Ar-CH), 4.62 (1H, d,  $J = 5.2$  Hz, NC-CH), 6.02 (2H, s, O-CH<sub>2</sub>-O), 6.85-8.00 (8H, m, Ar-H) ppm.

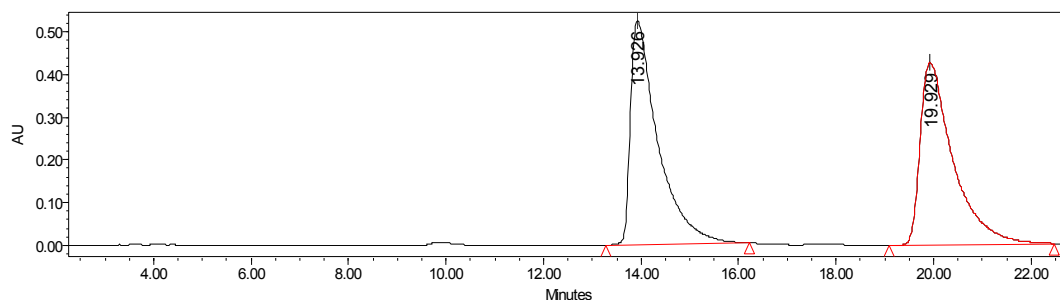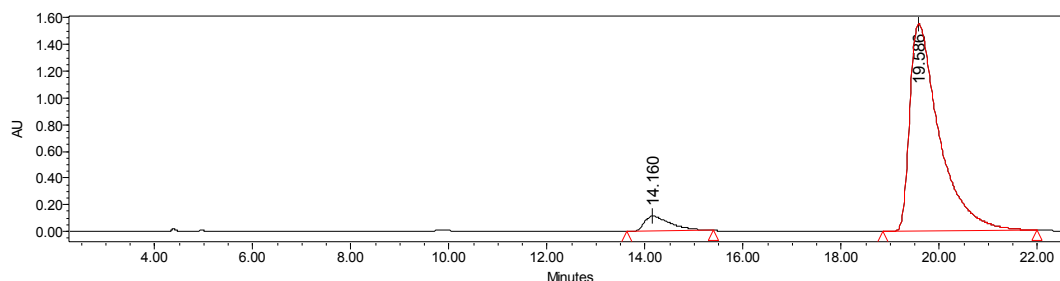

### 2-(1-(2-Methoxyphenyl)-3-Oxo-3-phenylpropyl)malononitrile (3j)

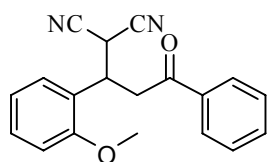

white solid; 89% yield, 87% ee;  $[\alpha]_D^{20} = 24.22$  (*c* 0.194 in  $\text{CH}_2\text{Cl}_2$ ); HPLC DAICEL CHIRALCEL IA, 2-propanol/*n*-hexane= 20/80, flow rate = 1.0 mL/min,  $\lambda = 254$  nm, retention time: 9.281 min (major) and 8.374 min (minor);  $^1\text{H}$  NMR (400 MHz,  $\text{CDCl}_3$ )  $\delta$  3.72 (2H, m, O=C-CH<sub>2</sub>), 3.92 (3H, s, -OCH<sub>3</sub>), 4.47 (1H, dd,  $J_1 = 6.8$  Hz,  $J_2 = 13.6$  Hz, Ar-CH), 4.69 (1H, d,  $J = 6.4$  Hz, NC-CH), 6.95-7.99 (9H, m, Ar-H) ppm;  $^{13}\text{C}$  NMR (100 MHz,  $\text{CDCl}_3$ )  $\delta$  27.1, 36.0, 39.1, 55.4, 111.1, 112.1, 112.3, 121.2, 124.5, 128.0, 128.7, 128.8, 130.1, 133.8, 136.0, 156.8, 196.5 ppm; HRMS (ESI-TOF) calcd for  $\text{C}_{19}\text{H}_{16}\text{N}_2\text{O}_2$  ( $[\text{M}-\text{H}]^+$ ) = 303.1139, Found 303.1150.

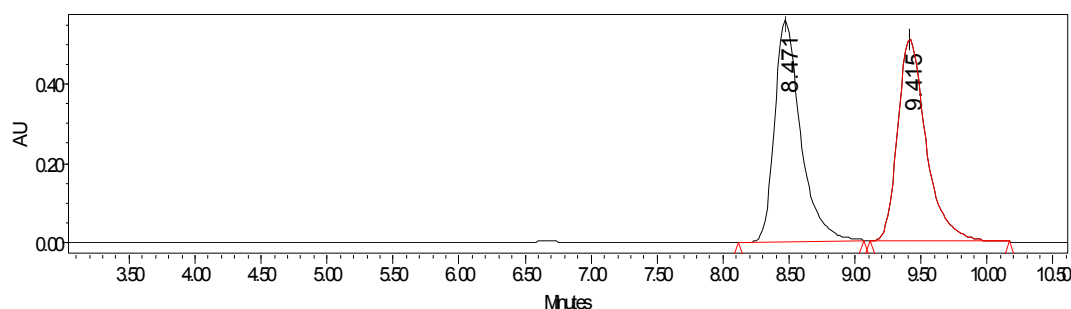

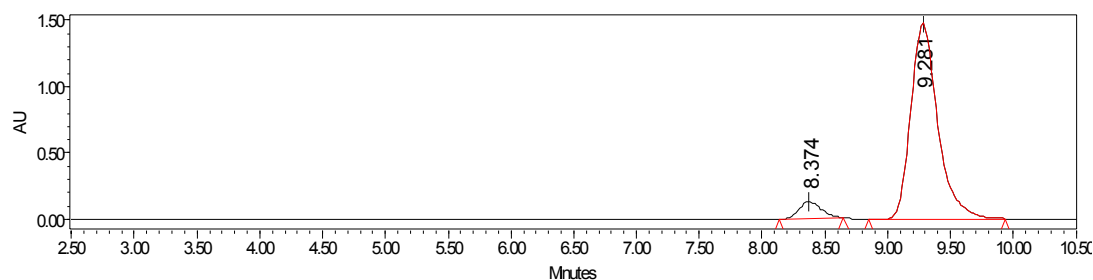

### 2-(1-(3-Methoxyphenyl)-3-Oxo-3-phenylpropyl)malononitrile (3k)

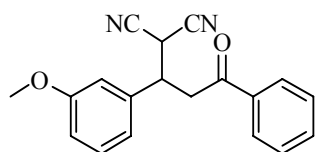

white solid; 84% yield, 84% ee;  $[\alpha]_D^{20} = -8.33$  (*c* 0.144 in  $\text{CH}_2\text{Cl}_2$ ); HPLC DAICEL CHIRALCEL IA, 2-propanol/*n*-hexane = 20/80, flow rate = 1.0 mL/min,  $\lambda = 254$  nm, retention time: 12.277 min (major) and 11.121 min (minor);  $^1\text{H}$  NMR (400 MHz,  $\text{CDCl}_3$ )  $\delta$  3.69 (2H, m,  $\text{O}=\text{C}-\text{CH}_2$ ), 3.85 (3H, s,  $-\text{OCH}_3$ ), 3.94 (1H, dt,  $J_1 = 5.6$  Hz,  $J_2 = 8.0$  Hz, Ar-CH), 4.66 (1H, d,  $J = 5.2$  Hz, NC-CH), 6.94-7.98 (9H, m, Ar-H) ppm;  $^{13}\text{C}$  NMR (100 MHz,  $\text{CDCl}_3$ )  $\delta$  28.7, 40.1, 41.1, 55.3, 111.7, 111.8, 113.9, 114.3, 120.0, 128.1, 128.9, 130.4, 134.1, 135.7, 138.0, 160.1, 196.6 ppm; HRMS (ESI-TOF) calcd for  $\text{C}_{19}\text{H}_{16}\text{N}_2\text{O}_2$  ( $[\text{M}-\text{H}]^+$ ) = 303.1139, Found 303.1142.

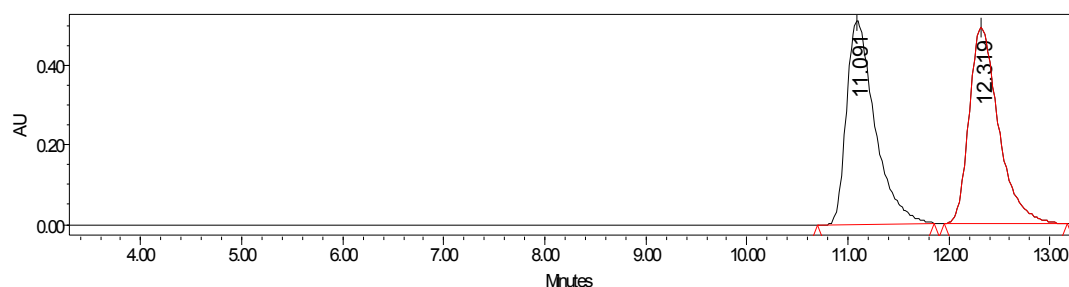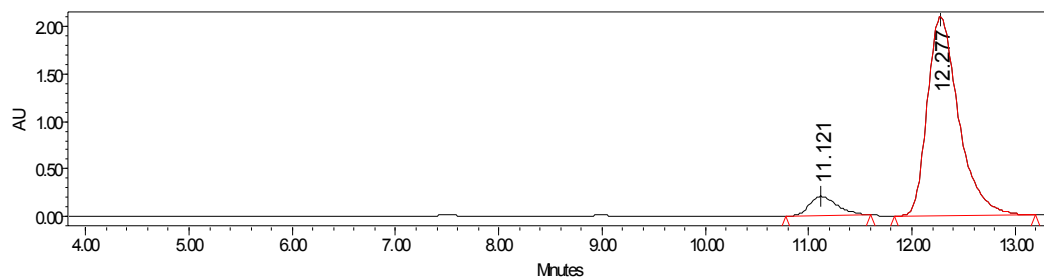

### 2-(1-(4-Methoxyphenyl)-3-Oxo-3-phenylpropyl)malononitrile (3l)

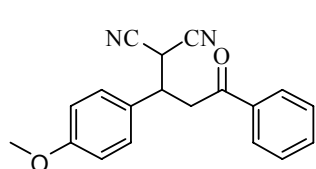

white solid; 89% yield, 88% ee;  $[\alpha]_D^{20} = -0.48$  (*c* 0.208 in  $\text{CH}_2\text{Cl}_2$ ); HPLC DAICEL CHIRALCEL IA, 2-propanol/*n*-hexane = 20/80, flow rate = 1.0 mL/min,  $\lambda = 254$  nm, retention time: 18.298 min (major) and 15.865 min (minor);  $^1\text{H}$  NMR (400 MHz,  $\text{CDCl}_3$ )  $\delta$  3.68 (2H, m,  $\text{OC}=\text{CH}_2$ ), 3.82 (3H, s,  $-\text{OCH}_3$ ) 3.92 (1H, dt,  $J_1 = 5.2$  Hz,  $J_2 = 8.4$  Hz, Ar-CH), 4.61 (1H, d,  $J = 5.2$  Hz, NC-CH), 6.93-7.98 (9H, m, Ar-H) ppm.

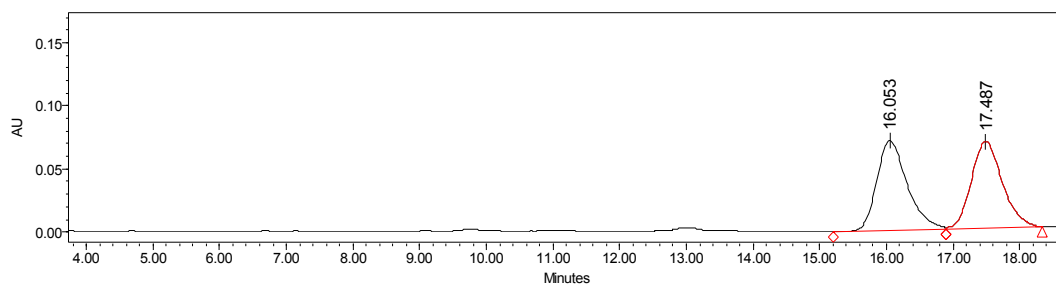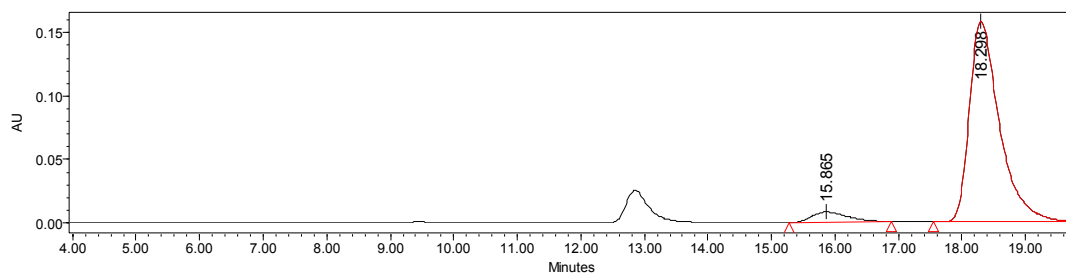

### 2-(1-(3-Methylphenyl)-3-Oxo-3-phenylpropyl)malononitrile (3m)

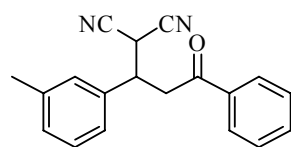

white solid; 84% yield, 90% ee;  $[\alpha]_D^{20} = -20.83$  (*c* 0.240 in  $\text{CH}_2\text{Cl}_2$ ); HPLC DAICEL CHIRALCEL AS-H, 2-propanol/*n*-hexane = 20/80, flow rate = 1.0 mL/min,  $\lambda = 210$  nm, retention time: 14.504 min (major) and 12.050 min (minor);  $^1\text{H}$  NMR (400 MHz,  $\text{CDCl}_3$ )  $\delta$  2.41 (3H, s, - $\text{CH}_3$ ), 3.69 (2H, m,  $\text{O}=\text{C}-\text{CH}_2$ ), 3.94 (1H, dt,  $J_1 = 5.2$  Hz,  $J_2 = 8.4$  Hz, Ar-CH), 4.66 (1H, d,  $J = 5.2$  Hz, NC-CH), 7.22-8.01 (9H, m, Ar-H) ppm;  $^{13}\text{C}$  NMR (100 MHz,  $\text{CDCl}_3$ )  $\delta$  21.5, 28.7, 40.1, 41.1, 111.7, 111.9, 124.9, 128.1, 128.6, 128.9, 129.2, 129.5, 134.1, 135.8, 136.5, 139.1, 196.7 ppm; HRMS (ESI-TOF) calcd for  $\text{C}_{19}\text{H}_{16}\text{N}_2\text{O}$  ( $[\text{M}-\text{H}]^+$ ) = 287.1190, Found 287.1191.

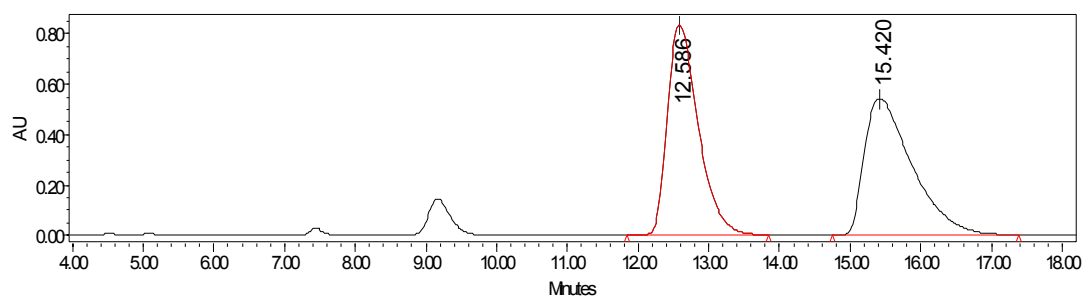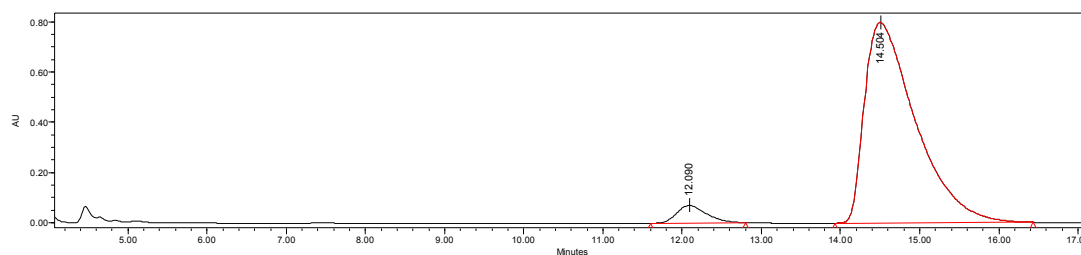

### 2-(1-(4-Methylphenyl)-3-Oxo-3-phenylpropyl)malononitrile (3n)

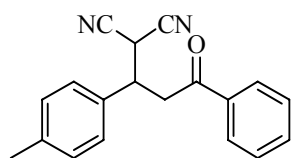

white solid; 84% yield, 87% ee;  $[\alpha]_D^{20} = -2.41$  (*c* 0.166 in  $\text{CH}_2\text{Cl}_2$ ); HPLC DAICEL CHIRALCEL IA, 2-propanol/*n*-hexane = 20/80, flow rate = 1.0 mL/min,  $\lambda = 210$  nm, retention time: 12.018 min (major) and 9.296 min (minor);  $^1\text{H}$  NMR (400 MHz,  $\text{CDCl}_3$ )  $\delta$  2.39 (3H, s,  $-\text{CH}_3$ ), 3.68 (2H, m,  $\text{O}=\text{C}-\text{CH}_2$ ), 3.95 (1H, dt,  $J_1 = 5.2$  Hz,  $J_2 = 8.4$  Hz, Ar-CH), 4.65 (1H, d,  $J = 5.2$  Hz, NC-CH), 7.25-8.00 (9H, m, Ar-H) ppm;  $^{13}\text{C}$  NMR (100 MHz,  $\text{CDCl}_3$ )  $\delta$  21.2, 28.9, 40.2, 40.9, 111.8, 111.9, 127.9, 128.1, 128.1, 128.9, 130.0, 133.5, 134.1, 135.8, 139.1, 139.1, 196.8 ppm; HRMS (ESI-TOF) calcd for  $\text{C}_{19}\text{H}_{16}\text{N}_2\text{O}$  ( $[\text{M}+\text{Na}^+]$ ) = 311.1155, Found 311.1165

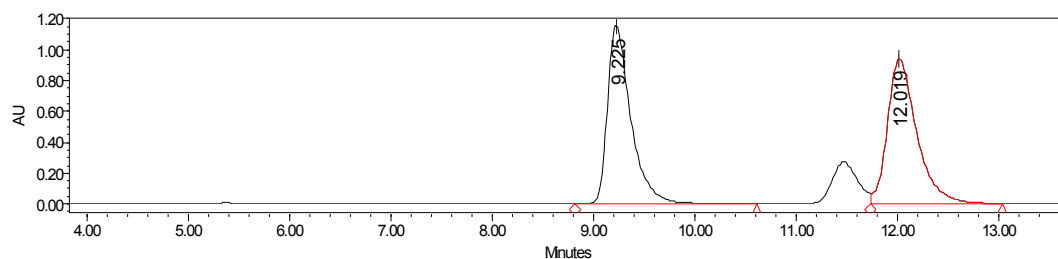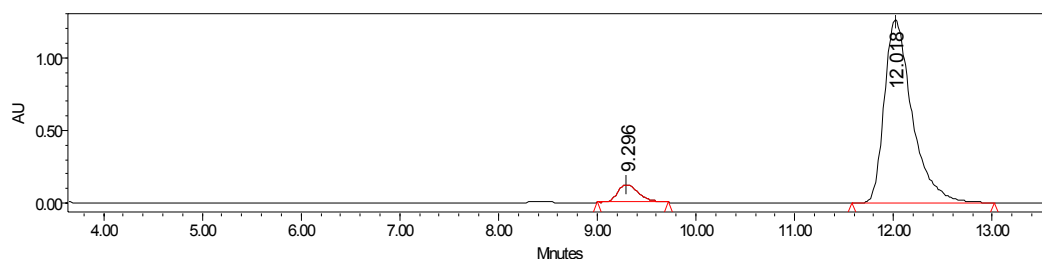

### 2-(1-(2-naphthyl)-3-Oxo-3-phenylpropyl)malononitrile (3o)

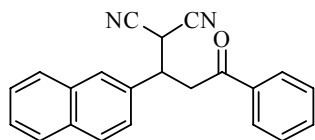

white solid; 86% yield, 88% ee;  $[\alpha]_D^{20} = -4.55$  (*c* 0.198 in  $\text{CH}_2\text{Cl}_2$ ); HPLC DAICEL CHIRALCEL IA, 2-propanol/*n*-hexane = 15/85, flow rate = 1.0 mL/min,  $\lambda = 210$  nm, retention time: 19.819 min (major) and 14.760 min (minor);  $^1\text{H}$  NMR (400 MHz,  $\text{CDCl}_3$ )  $\delta$  3.72 (2H, m,  $\text{O}=\text{C}-\text{CH}_2$ ), 4.07 (1H, dt,  $J_1 = 5.2$  Hz,  $J_2 = 8.4$  Hz, Ar-CH), 4.66 (1H, d,  $J = 5.2$  Hz, NC-CH), 7.41-7.93 (12H, m, Ar-H) ppm;  $^{13}\text{C}$  NMR (100 MHz,  $\text{CDCl}_3$ )  $\delta$  28.8, 40.3, 41.3, 111.79, 111.9, 125.2, 126.83, 126.87, 127.5, 127.7, 128.15, 128.19, 129.3, 133.4, 133.9, 134.1, 135.8, 196.6 ppm; HRMS (ESI-TOF) calcd for  $\text{C}_{22}\text{H}_{16}\text{N}_2\text{O}$  ( $[\text{M}-\text{H}^+]$ ) = 323.1190, Found 323.1176.

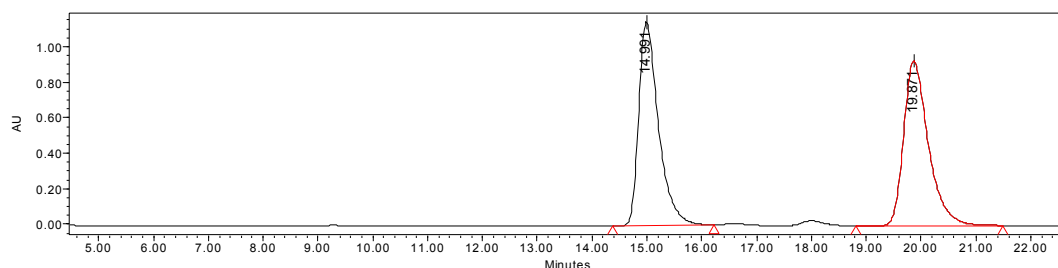

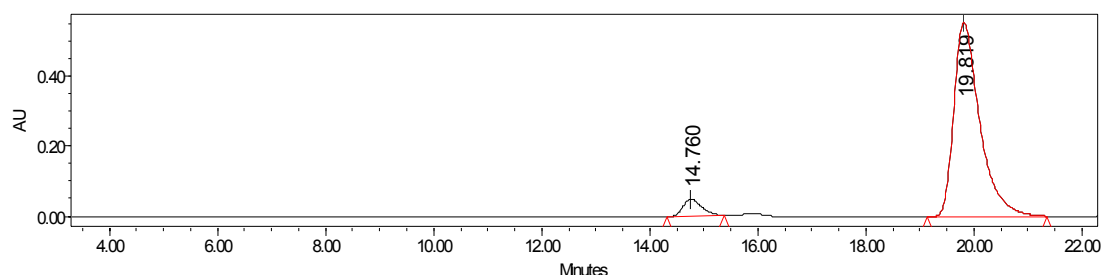

### 2-(1-(2-thienyl)-3-Oxo-3-phenylpropyl)malononitrile (3p)

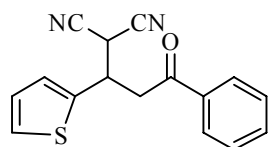

white solid; 83% yield, 86% ee;  $[\alpha]_D^{20} = -1.47$  (*c* 0.068 in  $\text{CH}_2\text{Cl}_2$ ); HPLC DAICEL CHIRALCEL IB, 2-propanol/*n*-hexane = 25/75, flow rate = 1.0 mL/min,  $\lambda = 254$  nm, retention time: 13.763 min (major) and 12.137 min (minor);  $^1\text{H}$  NMR (400 MHz,  $\text{CDCl}_3$ )  $\delta$  3.73 (2H, m, O=C- $\text{CH}_2$ ), 4.32 (1H, dt,  $J_1 = 4.8$  Hz,  $J_2 = 8.4$  Hz, Ar-CH), 4.71 (1H, d,  $J = 4.8$  Hz, NC-CH), 7.03-8.01 (8H, m, Ar-H) ppm;  $^{13}\text{C}$  NMR (100 MHz,  $\text{CDCl}_3$ )  $\delta$  29.5, 37.2, 41.4, 111.4, 111.7, 126.0, 127.1, 127.4, 128.1, 128.9, 134.3, 135.6, 138.5, 196.2 ppm; HRMS (ESI-TOF) calcd for  $\text{C}_{16}\text{H}_{12}\text{N}_2\text{OS}$  ( $[\text{M}-\text{H}^+]$ ) = 279.0597, Found 279.0600.

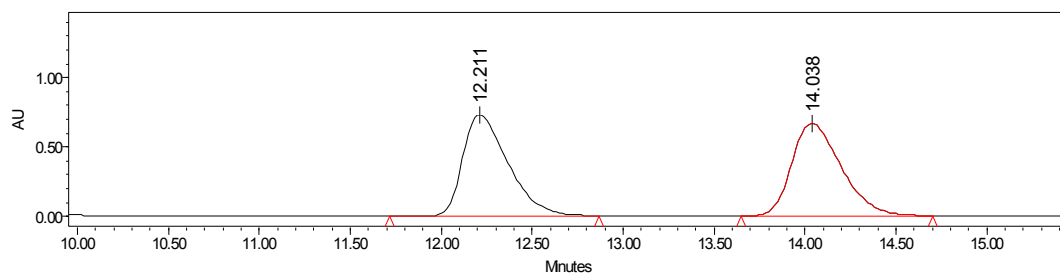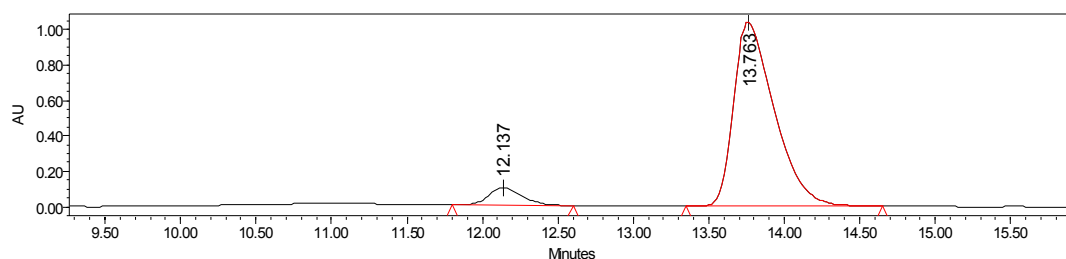

### 2-(1-cyclohexyl-3-Oxo-3-phenylpropyl)malononitrile (3q)

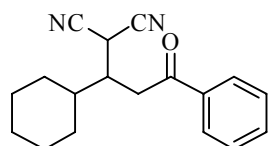

colorless liquid; 80% yield, 92% ee;  $[\alpha]_D^{20} = 37.21$  (*c* 0.086 in  $\text{CH}_2\text{Cl}_2$ ); HPLC DAICEL CHIRALCEL IA, 2-propanol/*n*-hexane = 5/95, flow rate = 1.0 mL/min,  $\lambda = 210$  nm, retention time: 13.986 min (major) and 12.999 min (minor);  $^1\text{H}$  NMR (400 MHz,  $\text{CDCl}_3$ )  $\delta$  1.26 (5H, m, cyclohexyl-H), 1.79 (6H, m, cyclohexyl-H), 2.73 (1H, m, cyclohexyl-CH), 3.17 (1H, dd,  $J_1 = 5.2$  Hz,  $J_2 = 12.0$  Hz, O=C-CH), 3.36 (1H, dd,  $J_1 = 3.2$  Hz,  $J_2 = 12.4$  Hz, OC=CH), 4.37 (1H, d,  $J = 3.2$  Hz, NC-CH), 7.49-7.99 (5H, m, Ar-H) ppm;  $^{13}\text{C}$  NMR (100 MHz,  $\text{CDCl}_3$ )  $\delta$  25.3, 25.9, 26.1, 26.2, 29.3, 31.2, 36.9, 40.0, 40.2, 112.4, 112.5, 128.1, 128.9, 134.0, 136.0, 197.2 ppm; HRMS (ESI-TOF) calcd for  $\text{C}_{18}\text{H}_{20}\text{N}_2\text{O}$  ( $[\text{M}+\text{Na}^+]$ ) = 303.1468, Found 303.1468.

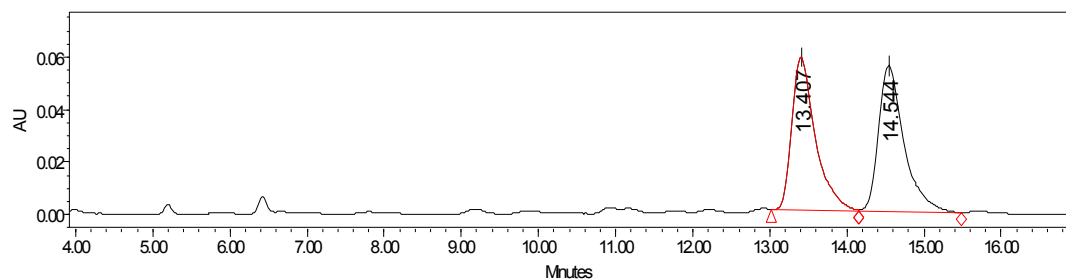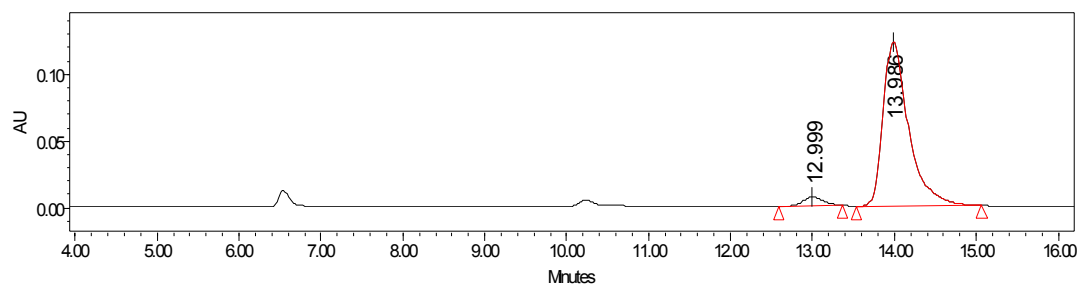

### 3-(2, 2-Methyl-5-Oxo-5-phenylpentyl)malononitrile (3r)

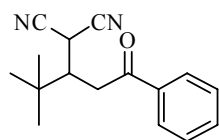

colorless liquid; 72% yield, 93% ee;  $[\alpha]_D^{20} = 38.10$  (*c* 0.042 in  $\text{CH}_2\text{Cl}_2$ ); HPLC DAICEL CHIRALCEL IA, 2-propanol/*n*-hexane = 5/95, flow rate = 1.0 mL/min,  $\lambda = 210$  nm, retention time: 12.857 min (major) and 16.140 min (minor);  $^1\text{H}$  NMR (400 MHz,  $\text{CDCl}_3$ )  $\delta$  1.10 (9H, s,  $(\text{CH}_3)_3\text{C}$ ), 2.93 (1H, m,  $(\text{CH}_3)_3\text{C}-\text{CH}$ ), 3.19 (1H, dd,  $J_1 = 4.8$  Hz,  $J_2 = 12.4$  Hz,  $\text{OC}=\text{CH}$ ), 3.41 (1H, dd,  $J_1 = 3.2$  Hz,  $J_2 = 12.4$  Hz,  $\text{O}=\text{C}-\text{CH}$ ), 4.09 (1H, d,  $J = 1.6$  Hz,  $\text{NC}-\text{CH}$ ), 7.50-8.02 (5H, m, Ar-H) ppm;  $^{13}\text{C}$  NMR (100 MHz,  $\text{CDCl}_3$ )  $\delta$  24.0, 27.7, 34.3, 37.2, 44.4, 113.00, 113.04, 128.2, 128.9, 133.9, 136.1, 196.7 ppm; HRMS (ESI-TOF) calcd for  $\text{C}_{16}\text{H}_{18}\text{N}_2\text{O}$  ( $[\text{M}+\text{Na}^+]$ ) = 277.1311, Found 277.1319.

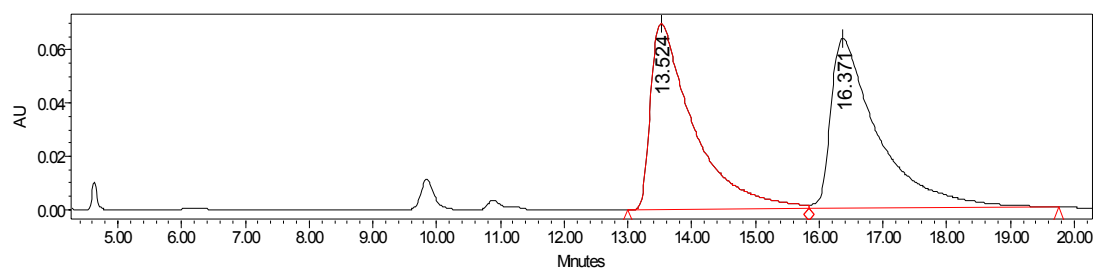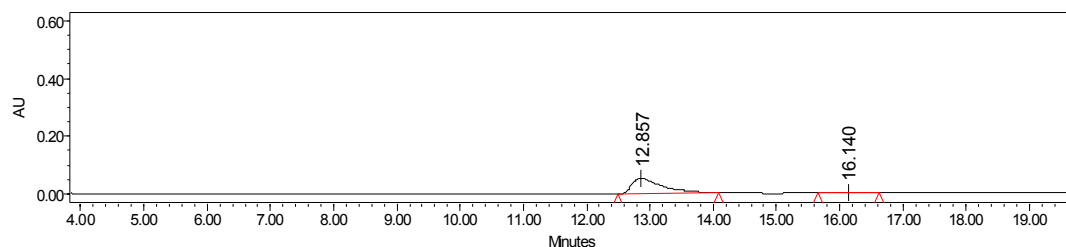

### 2-(3-(4-Chlorophenyl)-3-Oxo-3-phenylpropyl)malononitrile (3s)

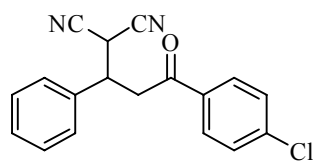

white solid; 88% yield, 80% ee;  $[\alpha]_D^{20} = 7.87$  (*c* 0.254 in  $\text{CH}_2\text{Cl}_2$ ); HPLC DAICEL CHIRALCEL IA, 2-propanol/*n*-hexane = 20/80, flow rate = 1.0 mL/min,  $\lambda = 254$  nm, retention time: 12.263 min (major) and 10.749 min (minor);  $^1\text{H}$  NMR (400 MHz,  $\text{CDCl}_3$ )  $\delta$  3.64 (2H, m,  $\text{OC}=\text{CH}_2$ ), 3.95 (1H, dt,  $J_1 = 5.2$  Hz,  $J_2 = 8.0$  Hz, Ar-CH), 4.62 (1H, d,  $J = 5.2$  Hz, NC-CH), 7.40-7.92 (9H, m, Ar-H)

ppm.

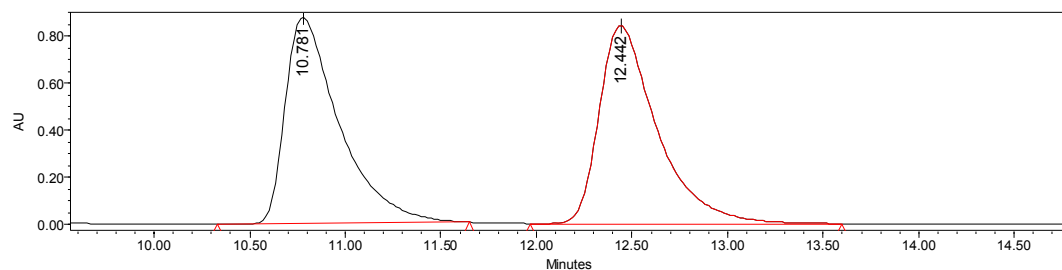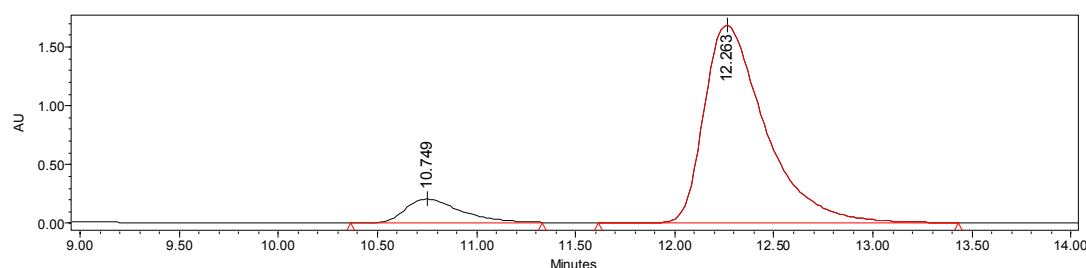

### 2-(3-(3-Methoxyphenyl)-3-Oxo-3-phenylpropyl)malononitrile (3t)

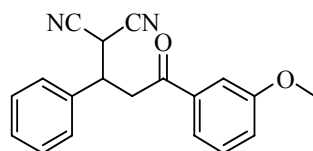

white solid; 84% yield, 84% ee;  $[\alpha]_D^{20} = -4.17$  (*c* 0.120 in  $\text{CH}_2\text{Cl}_2$ ); HPLC DAICEL CHIRALCEL IB, 2-propanol/*n*-hexane = 20/80, flow rate = 1.0 mL/min,  $\lambda = 254$  nm, retention time: 21.364 min (major) and 18.208 min (minor);  $^1\text{H}$  NMR (400 MHz,  $\text{CDCl}_3$ )  $\delta$  3.64 (2H, m,  $\text{O}=\text{C}-\text{CH}_2$ ), 3.91 (3H, s,  $-\text{OCH}_3$ ), 3.96 (1H, dd,  $J_1 = 5.2$  Hz,  $J_2 = 9.6$  Hz, Ar-H), 4.72 (1H, d,  $J = 5.2$  Hz, NC-CH), 6.96-7.98 (9H, m, Ar-H) ppm. HRMS (ESI-TOF) calcd for  $\text{C}_{19}\text{H}_{16}\text{N}_2\text{O}_2$  ( $[\text{M}-\text{H}^+]$ ) = 303.1139, Found 303.1132.

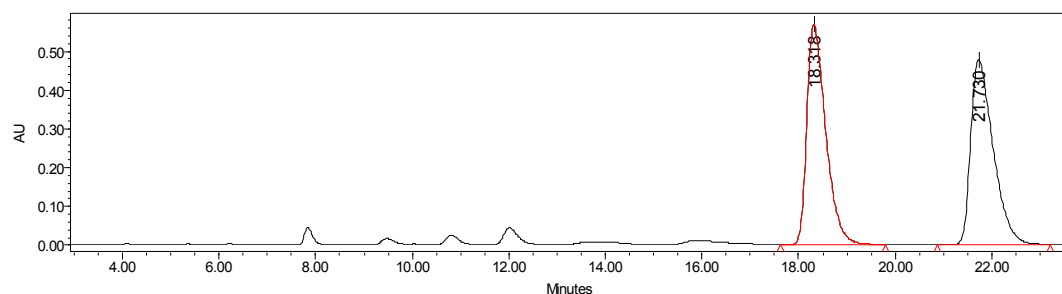



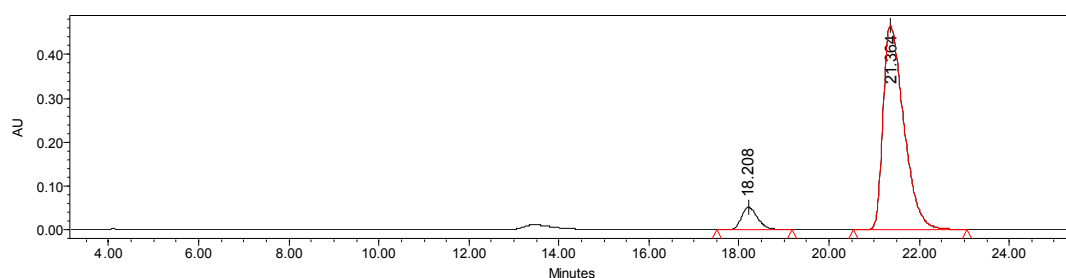

### 2-(3-(2-naphthyl)-3-Oxo-3-phenylpropyl)malononitrile (3u)

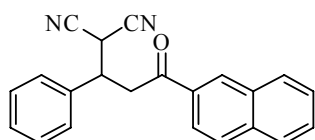

white solid; 97% yield, 85% ee;  $[\alpha]_D^{20} = 26.70$  (*c* 0.206 in  $\text{CH}_2\text{Cl}_2$ ); HPLC DAICEL CHIRALCEL IB, 2-propanol/*n*-hexane = 20/80, flow rate = 1.0 mL/min,  $\lambda = 254$  nm, retention time: 21.916 min (major) and 20.560 min (minor);  $^1\text{H}$  NMR (400 MHz,  $\text{CDCl}_3$ )  $\delta$  3.87 (2H, m, O=C-CH<sub>2</sub>), 4.04 (1H, dt,  $J_1 = 5.2$  Hz,  $J_2 = 8.0$  Hz, Ar-CH), 4.72 (1H, d,  $J = 5.2$  Hz, NC-CH), 7.43-8.52 (12H, m, Ar-H) ppm;  $^{13}\text{C}$  NMR (100 MHz,  $\text{CDCl}_3$ )  $\delta$  28.8, 40.1, 41.3, 111.7, 111.9, 123.3, 127.2, 127.8, 128.0, 128.9, 129.1, 129.2, 129.3, 129.7, 130.1, 132.3, 133.1, 136.0, 136.6, 196.5 ppm; HRMS (ESI-TOF) calcd for  $\text{C}_{22}\text{H}_{16}\text{N}_2\text{O}$  ( $[\text{M}-\text{H}^+]$ ) = 323.1190, Found 323.1183.

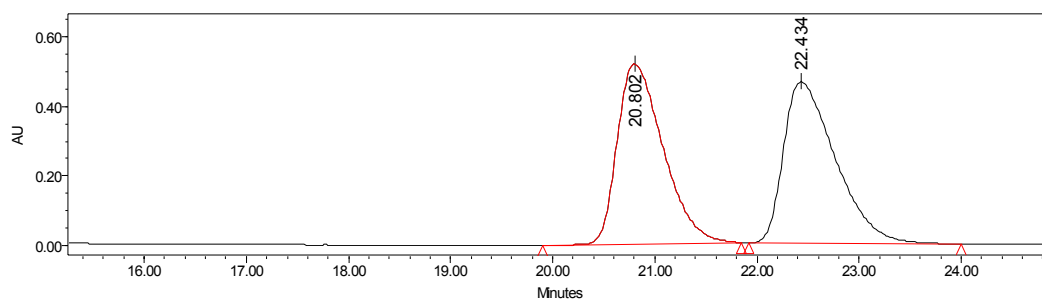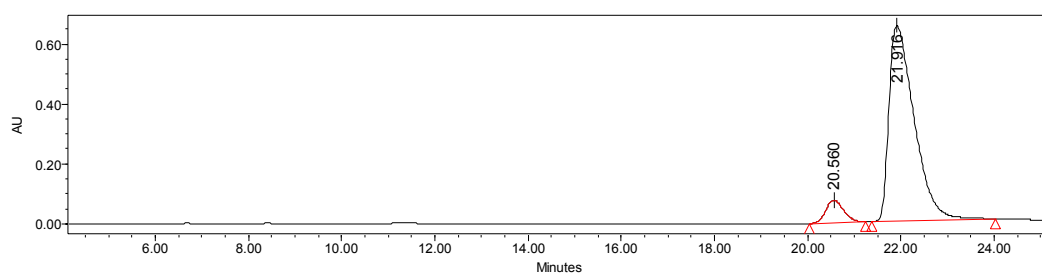

### 2-(3-(2-thienyl)-3-Oxo-3-phenylpropyl)malononitrile (3v)

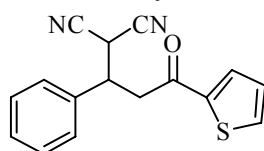

white solid; 92% yield, 77% ee;  $[\alpha]_D^{20} = -1.80$  (*c* 0.278 in  $\text{CH}_2\text{Cl}_2$ ); HPLC DAICEL CHIRALCEL IB, 2-propanol/*n*-hexane = 25/75, flow rate = 1.0 mL/min,  $\lambda = 254$  nm, retention time: 19.464 min (major) and 14.036 min (minor);  $^1\text{H}$  NMR (400 MHz,  $\text{CDCl}_3$ )  $\delta$  3.64 (2H, m, O=C-CH<sub>2</sub>), 3.95 (1H, dt,  $J_1 = 5.2$  Hz,  $J_2 = 8.4$  Hz, Ar-CH), 4.67 (1H, d,  $J = 5.2$  Hz, NC-CH), 7.18-7.80 (8H, m, Ar-H) ppm.

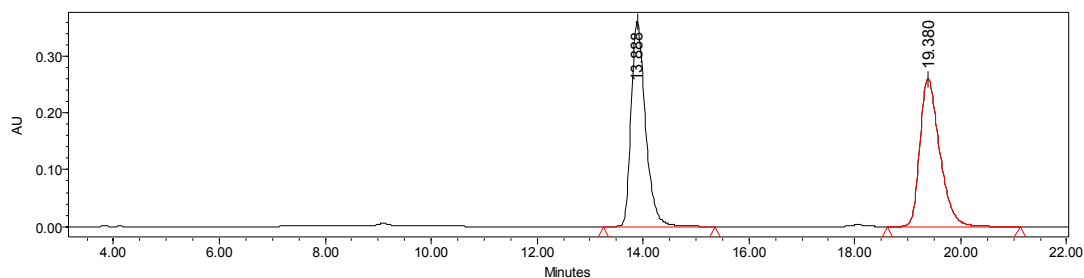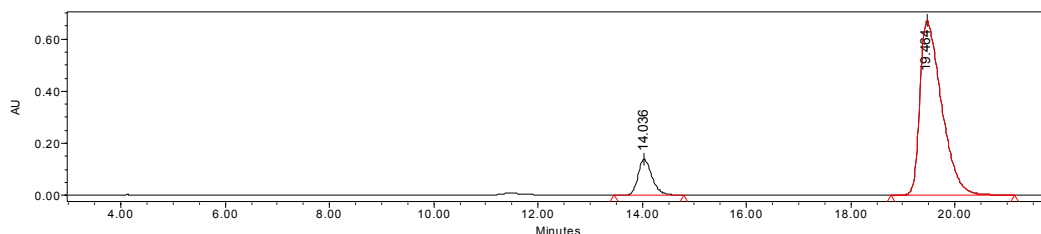

### 2-amino-4,6-diphenyl-4H-pyran-3-carbonitrile (4a)

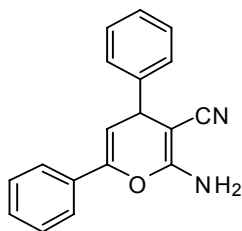

white solid; 51% yield; IR 3478.18, 3377.45 (-NH<sub>2</sub>), 3226.99 (C=C), 2215.84 (-CN), 1635.64 (-O-C=CH); HRMS (ESI-TOF) calcd for C<sub>18</sub>H<sub>14</sub>N<sub>2</sub>O ([M-H<sup>+</sup>]) = 273.1033, Found 273.1028.

### 2-oxo-4,6-diphenyl-3,4-dihydro-2H-pyran-3-carbonitrile (5e)

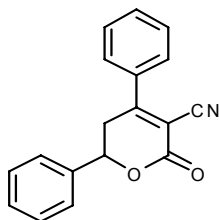

2-amino-4,6-diphenyl-4(H)-pyran-3-carbonitrile (0.274 mg, 1 mmol) was added in 99% ethanol (5 mL), then triethylamine (0.5 mL) was added. The resulting solution was stirred at room temperature for 48 h. Following, the solvent was removed. The reaction mixture was directly purified by column chromatography on silica gel eluted (CH<sub>2</sub>Cl<sub>2</sub>: petroleum ether = 1:3) to afford the corresponding compound.

white solid; 22% yield; HPLC DAICEL CHIRALCEL IA, 2-propanol/*n*-hexane = 10/90, flow rate = 1.0 mL/min, λ = 254 nm, retention time: 11.504 min (major) and 10.961 min (minor); IR 3226.99 (C=C), 2215.84 (-CN), 1730.19 (C=O); <sup>1</sup>H NMR (400 MHz, CDCl<sub>3</sub>) δ 3.62 (dd, 1H, *J*<sub>1</sub> = 10.0 Hz, *J*<sub>2</sub> = 25.2 Hz, Ar-CH), 3.946 (dd, 2H, *J*<sub>1</sub> = 10.4 Hz, *J*<sub>2</sub> = 24.8 Hz, C=C-CH<sub>2</sub>), 7.32-7.87 (m, 10H, Ar-H) ppm; <sup>13</sup>C NMR (100 MHz, CDCl<sub>3</sub>) δ 42.3, 44.7, 48.0, 115.2, 128.0, 128.7, 128.8, 129.0, 129.3, 133.6, 135.8, 136.1, 194.9 ppm; HRMS (ESI-TOF) calcd for C<sub>18</sub>H<sub>13</sub>N<sub>2</sub>O ([M-H<sup>+</sup>]) = 274.0873, Found 274.0865.

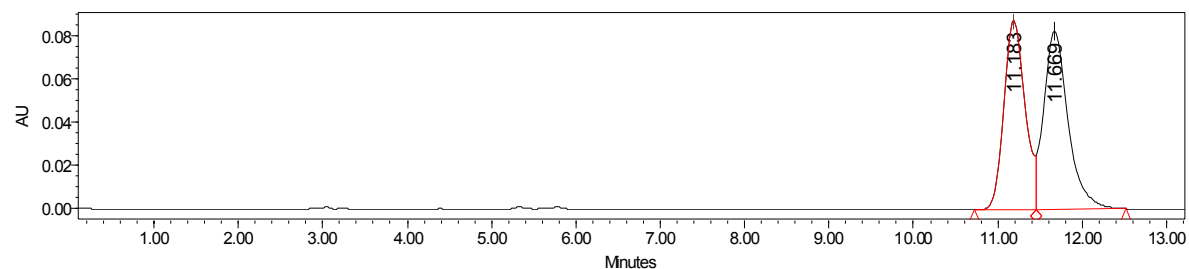

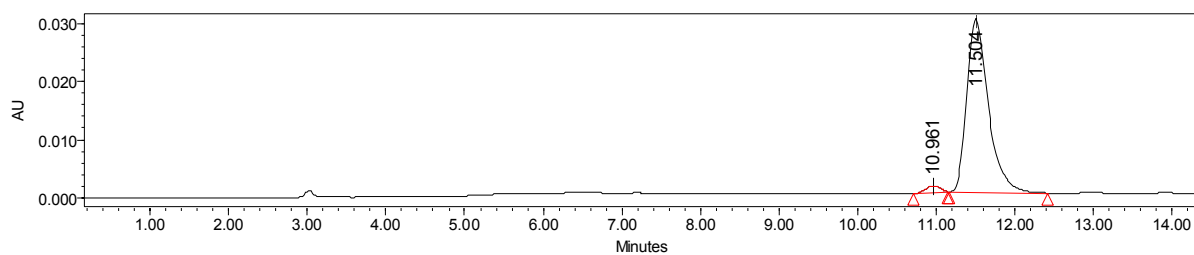

### (H) Copies of NMR spectra for all compounds

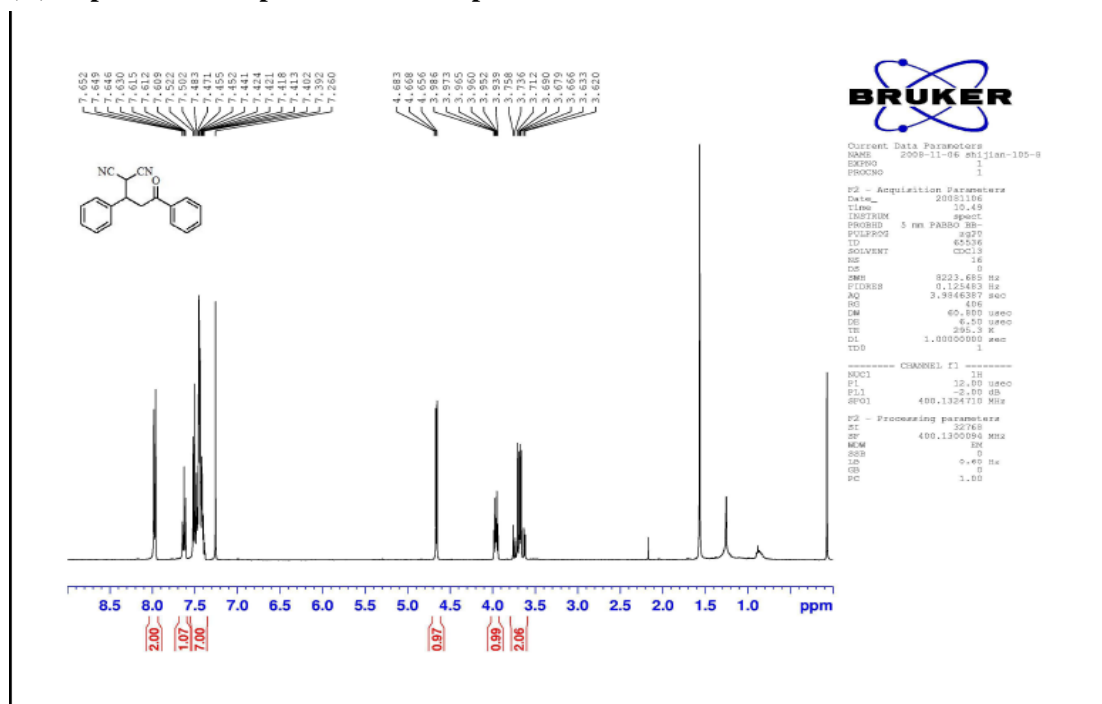

7.957  
7.956  
7.955  
7.953  
7.637  
7.621  
7.618  
7.526  
7.506  
7.487  
7.486  
7.453  
7.449  
7.444  
7.436  
7.360  
7.260  
7.154  
7.133  
7.111

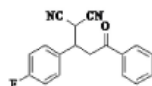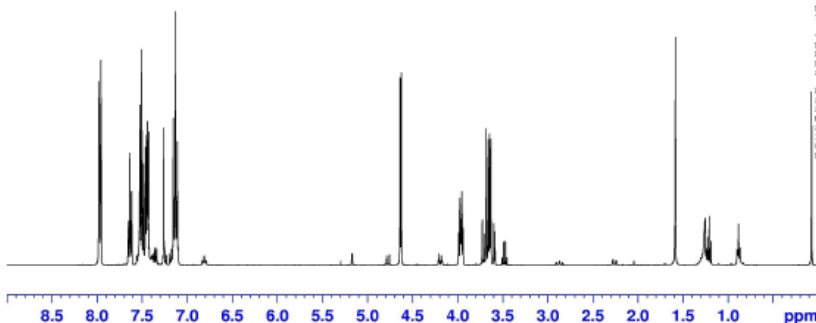

2.03  
1.05  
2.09  
2.06  
2.06

1.00  
1.03  
2.07

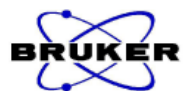

Current Data Parameters  
 NAME 2008-12-03 eb11an-87-88-5  
 EXPNO 1  
 PROCNO 1  
 F2 - Acquisition Parameters  
 Date\_ 20081203  
 Time 01:05  
 INSTRUM spect  
 PROBRD 5 mm F400 BBO  
 PULPROG zg30  
 ID 65356  
 SOLVENT CDCl3  
 NS 16  
 DS 0  
 SWH 8223.685 Hz  
 FIDRES 0.120485 Hz  
 AQ 3.9866287 sec  
 RG 328  
 DW 40.800 usec  
 DE 6.50 usec  
 TE 295.4 K  
 D1 1.00000000 sec  
 TSD 3

----- CHANNEL f1 -----  
 NUC1 1H  
 P1 12.00 usec  
 PL1 -2.00 dB  
 SFO1 400.1324710 MHz  
 F2 - Processing parameters  
 SI 32768  
 SF 400.1300194 MHz  
 MCW 0  
 SSB 0  
 LB 0.30 Hz  
 GB 0  
 PC 1.00

7.983  
7.965  
7.962  
7.959  
7.838  
7.825  
7.622  
7.619  
7.550  
7.495  
7.481  
7.451  
7.448  
7.447  
7.407  
7.385  
7.380  
7.360  
7.381  
7.377  
7.372  
7.363  
7.357  
7.260

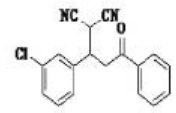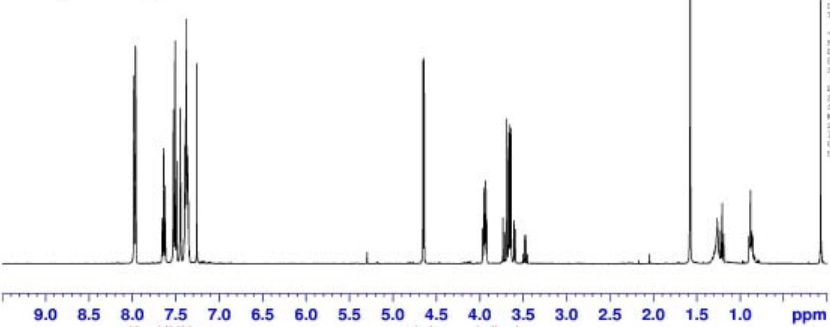

1.96  
1.00  
2.04  
1.01  
2.88

0.97  
1.00  
2.04

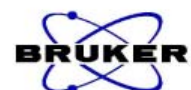

Current Data Parameters  
 NAME 2008-12-03 eb11an-87-88-3  
 EXPNO 1  
 PROCNO 1  
 F2 - Acquisition Parameters  
 Date\_ 20081203  
 Time 01:56  
 INSTRUM spect  
 PROBRD 5 mm F400 BBO  
 PULPROG zg30  
 ID 65356  
 SOLVENT CDCl3  
 NS 16  
 DS 0  
 SWH 8223.685 Hz  
 FIDRES 0.120485 Hz  
 AQ 3.9866287 sec  
 RG 328  
 DW 40.800 usec  
 DE 6.50 usec  
 TE 295.4 K  
 D1 1.00000000 sec  
 TSD 3

----- CHANNEL f1 -----  
 NUC1 1H  
 P1 12.00 usec  
 PL1 -2.00 dB  
 SFO1 400.1324710 MHz  
 F2 - Processing parameters  
 SI 32768  
 SF 400.1300194 MHz  
 MCW 0  
 SSB 0  
 LB 0.30 Hz  
 GB 0  
 PC 1.00

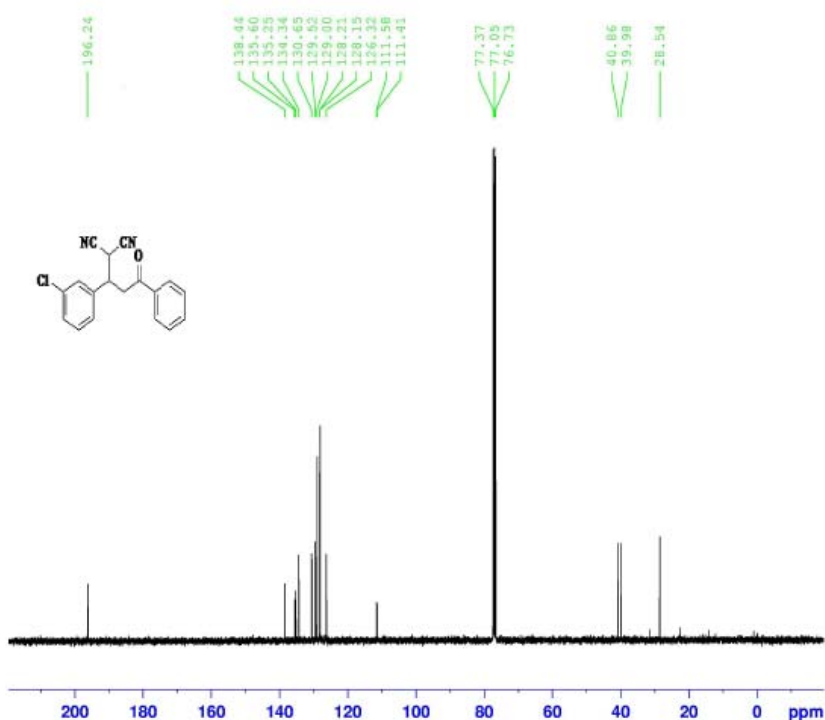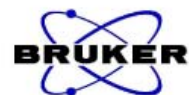

Current Data Parameters  
 NAME 2009-12-15 haling-12-11-2  
 EXPNO 1  
 PROCNO 1

F2 - Acquisition Parameters  
 Date\_ 20091215  
 Time 17.52  
 INSTRUM spect  
 PROBRD 5 mm PABBO BB-  
 PULPROG zgpg30  
 TD 49224  
 SOLVENT CDCl3  
 NS 252  
 DS 0  
 SFO 24038.461 Hz  
 FIDRES 0.346700 Hz  
 AQ 1.3621989 sec  
 RG 2059  
 DM 20.800 usec  
 DE 4.50 usec  
 TE 303.2 K  
 D1 2.0000000 sec  
 d11 0.0300000 sec  
 DELTA 1.8939999 sec  
 TD0 1

----- CHANNEL f1 -----  
 NUC1 13C  
 P1 12.00 usec  
 PL1 -1.00 dB  
 SFO1 100.6228298 MHz

----- CHANNEL f2 -----  
 CPDPRG2 waltz16  
 NUC2 1H  
 PCPD2 60.00 usec  
 PL12 11.00 dB  
 PL13 13.00 dB  
 PL14 -2.00 dB  
 SFO2 400.1318003 MHz

F2 - Processing parameters  
 SI 32768  
 SF 100.6127430 MHz  
 MCM 64  
 SSB 0  
 LB 1.00 Hz  
 GB 0  
 PC 1.40

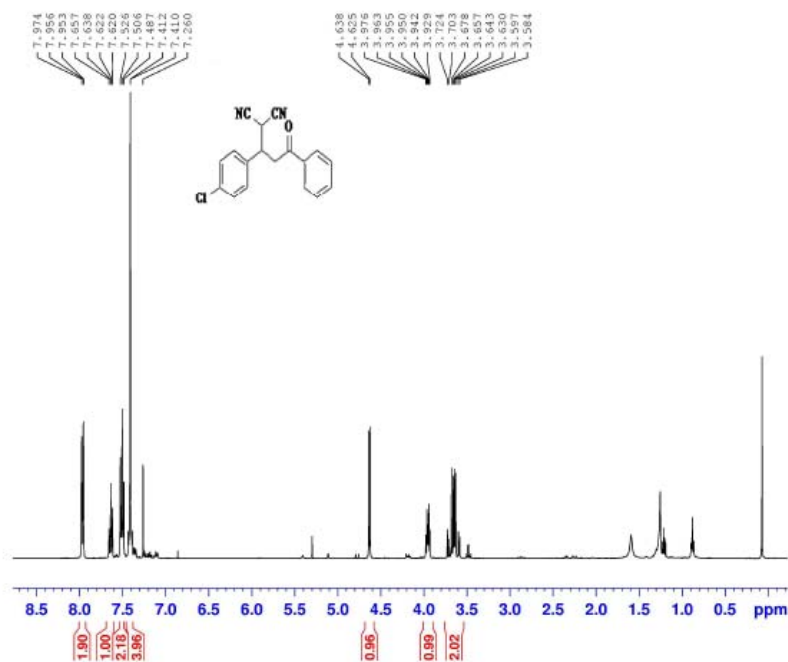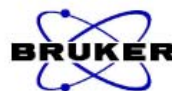

Current Data Parameters  
 NAME 2009-12-03 haling-07-08-4  
 EXPNO 1  
 PROCNO 1

F2 - Acquisition Parameters  
 Date\_ 20091203  
 Time 21.00  
 INSTRUM spect  
 PROBRD 5 mm PABBO BB-  
 PULPROG zgpg30  
 TD 49224  
 SOLVENT CDCl3  
 NS 16  
 DS 0  
 SFO 422.665 Hz  
 FIDRES 0.125483 Hz  
 AQ 3.866287 sec  
 RG 128  
 DM 40.800 usec  
 DE 6.50 usec  
 TE 296.4 K  
 D1 1.0000000 sec  
 TD0 1

----- CHANNEL f1 -----  
 NUC1 1H  
 P1 12.00 usec  
 PL1 -2.00 dB  
 SFO1 400.1326723 MHz

F2 - Processing parameters  
 SI 32768  
 SF 400.1326723 MHz  
 MCM 64  
 SSB 0  
 LB 0.50 Hz  
 GB 0  
 PC 1.00

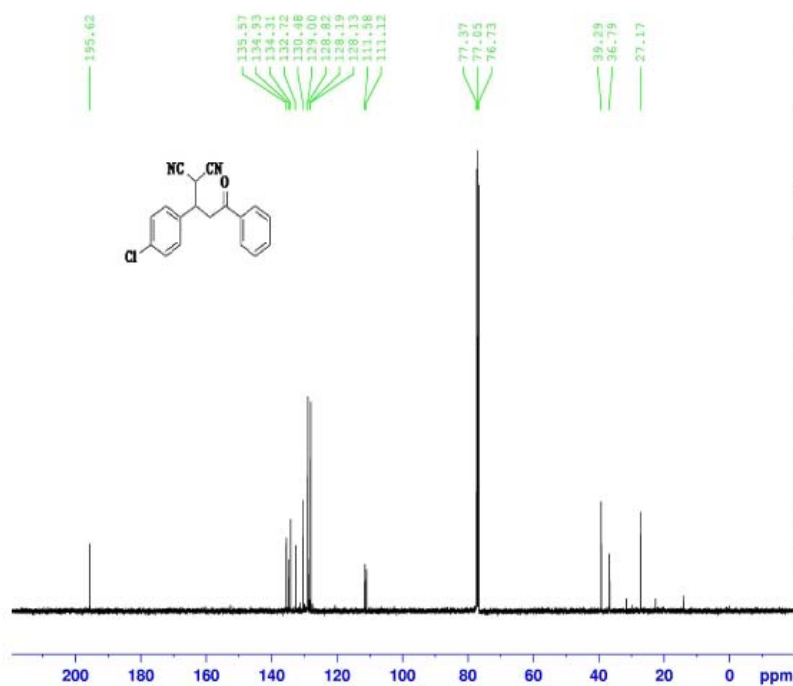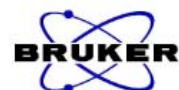

```

Current Data Parameters
NAME      2009-12-15 helling-12-11-1
EXPNO    1
PROCNO   1

F2 - Acquisition Parameters
Date_    20091215
Time     12.29
INSTRUM  spect
PROBHD   5 mm F400 QNP-
PULPROG  zgpg30
TD       65536
SOLVENT  CDCl3
NS       12
DS       1
SWH      20079.487 Hz
FIDRES   0.266798 Hz
AQ       1.3631989 sec
RG       2000
CW       20.900 usec
DE       4.50 usec
TE       299.1 K
SI       2.0000000 sec
SFO      0.0300000 sec
DELTA    1.88888893 sec
TD0      1

----- CHANNEL f1 -----
NUC1      13C
P1        15.00 usec
PL1       -1.00 dB
SFO1     100.6284294 MHz

----- CHANNEL f2 -----
CPDPRG2  waltz16
NUC2      1H
PCPD2    60.00 usec
PL12     11.00 dB
PL13     13.00 dB
PL14     -1.00 dB
SFO2     400.1314000 MHz

F2 - Processing parameters
SI        32768
SF        100.6127690 MHz
WDW       EM
SSB       0
LB        1.00 Hz
GB        0
PC        1.40
    
```

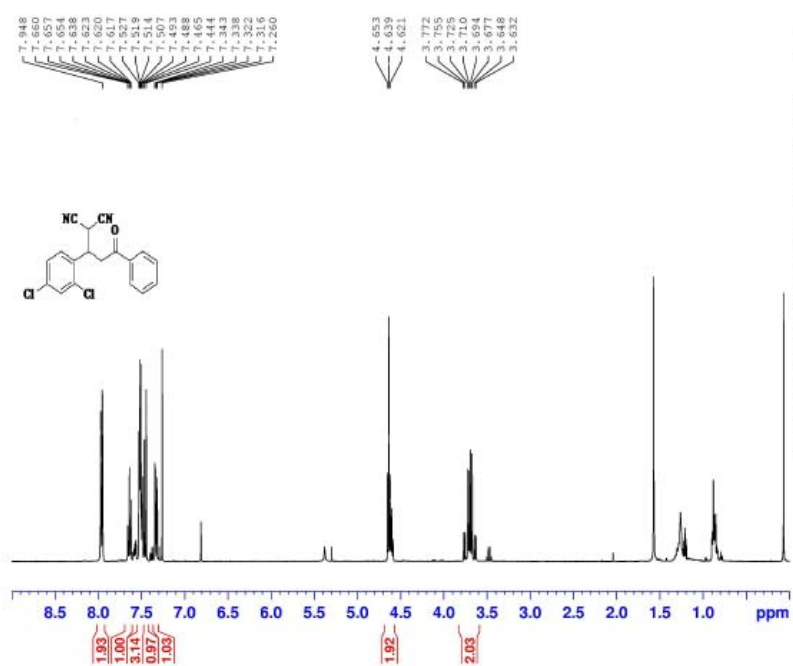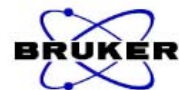

```

Current Data Parameters
NAME      2009-12-03 shijian-07-88-2
EXPNO    1
PROCNO   1

F2 - Acquisition Parameters
Date_    20091203
Time     21.09
INSTRUM  spect
PROBHD   5 mm F400 QNP-
PULPROG  zgpg30
TD       65536
SOLVENT  CDCl3
NS       12
DS       1
SWH      8225.865 Hz
FIDRES   0.125483 Hz
AQ       3.9846397 sec
RG       128
CW       60.800 usec
DE       4.50 usec
TE       299.2 K
SI       1.0000000 sec
SFO      0.0300000 sec
TD0      1

----- CHANNEL f1 -----
NUC1      1H
P1        12.00 usec
PL1       -2.00 dB
SFO1     400.1324710 MHz

F2 - Processing parameters
SI        32768
SF        400.1300093 MHz
WDW       EM
SSB       0
LB        0.20 Hz
GB        0
PC        1.00
    
```

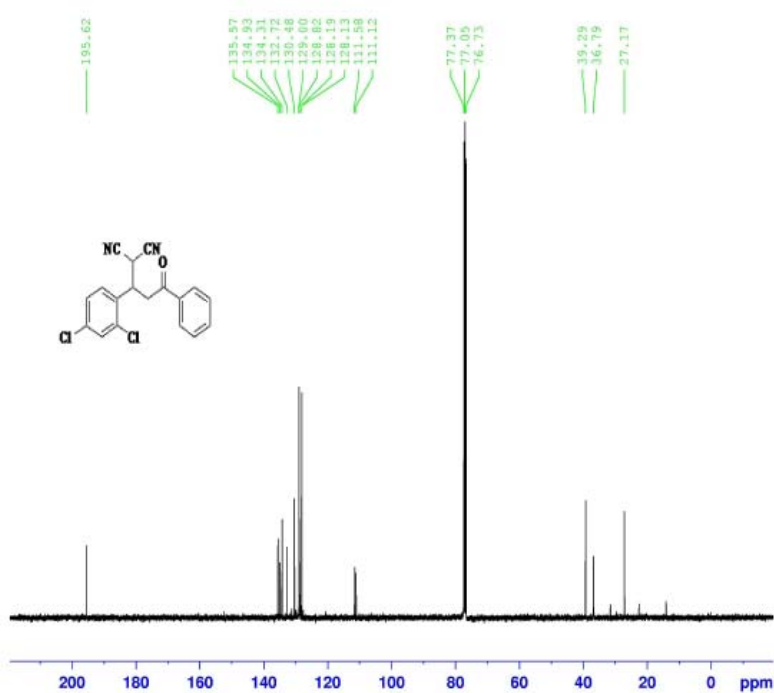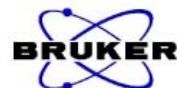

Current Data Parameters  
NAME 2009-12-12 h01g-12-11-1  
EXPNO 1  
PROCNO 1

F2 - Acquisition Parameters  
Date\_ 20091215  
Time 12.29  
INSTRUM spect  
PROBHD 5 mm F400 BBO  
PULPROG zgpg30  
TD 65536  
SOLVENT CDCl3  
NS 212  
DS 0  
SWH 24078.481 Hz  
FIDRES 0.240788 Hz  
AQ 1.3621988 sec  
RG 2000  
DM 20.800 usec  
DE 4.50 usec  
TE 297.1 K  
D1 2.0000000 sec  
dEL 0.0000000 sec  
DELTA 1.8933333 sec  
TD0 1

----- CHANNEL f1 -----  
NUC1 13C  
P1 15.00 usec  
PL1 -1.00 dB  
SFO1 100.6229288 MHz

----- CHANNEL f2 -----  
CEDEPRG waltz16  
NUC2 1H  
FPCD2 40.00 usec  
PL12 11.00 dB  
PL13 13.00 dB  
PL14 -2.00 dB  
SFO2 400.1314003 MHz

F2 - Processing parameters  
SI 32768  
SF 100.6127490 MHz  
WDW EM  
SSB 0  
LB 1.00 Hz  
GB 0  
PC 1.40

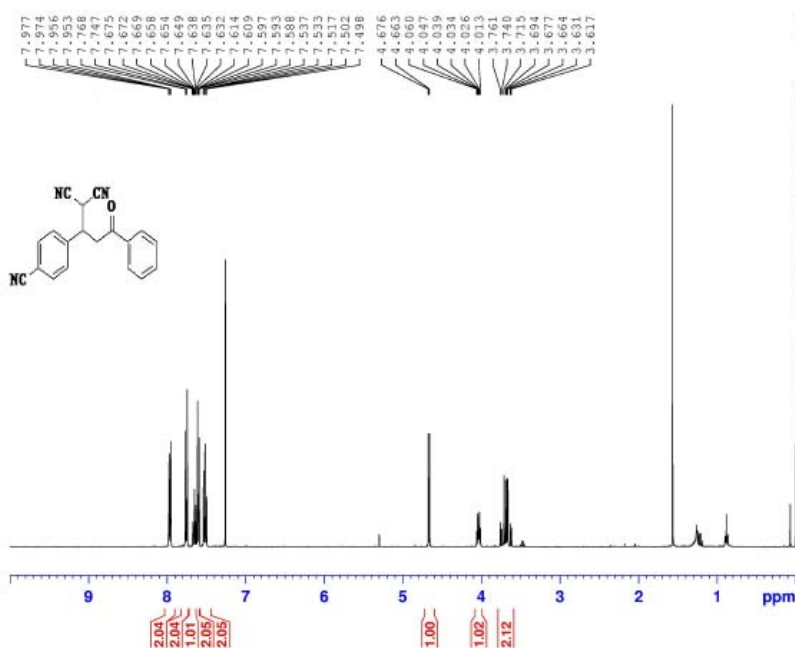

Current Data Parameters  
NAME 2009-03-03 ah1 jlan 3-5  
EXPNO 1  
PROCNO 1

F2 - Acquisition Parameters  
Date\_ 20090303  
Time 10.19  
INSTRUM spect  
PROBHD 5 mm F400 BBO  
PULPROG zgpg30  
TD 65536  
SOLVENT CDCl3  
NS 16  
DS 0  
SWH 8223.683 Hz  
FIDRES 0.120483 Hz  
AQ 3.9846367 sec  
RG 80.0  
DM 60.800 usec  
DE 6.50 usec  
TE 295.1 K  
D1 1.0000000 sec  
TD0 1

----- CHANNEL f1 -----  
NUC1 1H  
P1 12.00 usec  
PL1 -2.00 dB  
SFO1 400.1326710 MHz

F2 - Processing parameters  
SI 32768  
SF 400.1300990 MHz  
WDW EM  
SSB 0  
LB -0.20 Hz  
GB 0  
PC 1.00

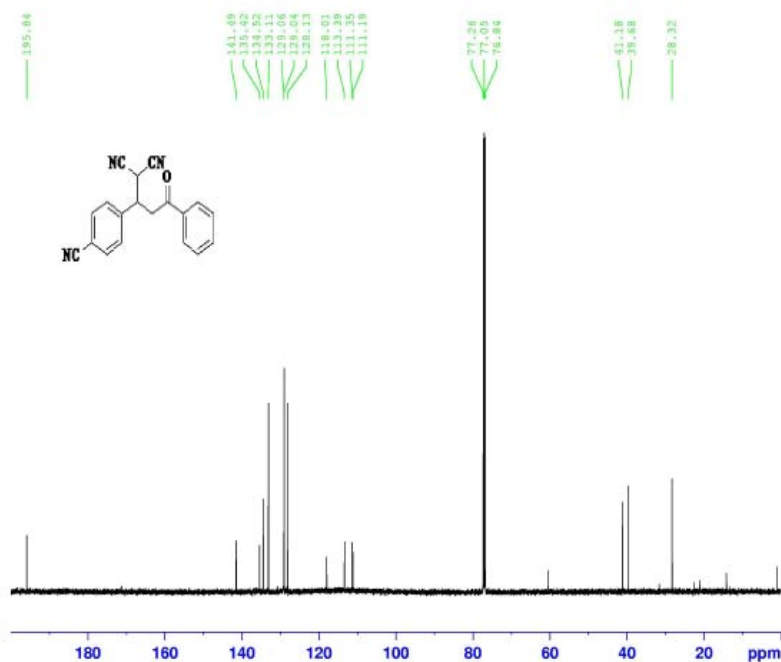

Current Data Parameters  
NAME 2009-01-09 helling 43-111-1  
EXPRNO 1  
PROCNO 1

F2 - Acquisition Parameters  
Date\_ 20090109  
Time 16.09  
INSTRUM spect  
PROBHD 5 mm PA1X1 1H/  
PULPROG zgpg30  
LV 45234  
SOLVENT CDCl3  
NS 12  
DS 0  
SWH 36057.692 Hz  
FIDRES 0.550197 Hz  
AQ 0.3906128 sec  
RG 181  
WDW EM  
SSB 0  
LB 8.50 usec  
TE 294.2 K  
SI 2.0000000 sec  
dS1 0.0300000 sec  
DELTA 1.8999999 sec  
TD 1

----- CHANNEL f1 -----  
NUC1 13C  
P1 11.20 usec  
PL1 -3.00 dB  
SFO1 100.6170888 MHz

----- CHANNEL f2 -----  
CPDPRG2 waltz16  
NUC2 1H  
P2 19.00 usec  
PL2 19.50 dB  
PL12 19.50 dB  
PL13 19.50 dB  
PL14 19.50 dB  
PL15 19.50 dB  
PL16 19.50 dB  
PL17 19.50 dB  
PL18 19.50 dB  
PL19 19.50 dB  
PL20 19.50 dB  
SFO2 400.1326000 MHz

F2 - Processing parameters  
SI 32768  
SF 400.1326000 MHz  
WDW EM  
SSB 0  
LB 1.00 Hz  
GB 0  
PC 1.40

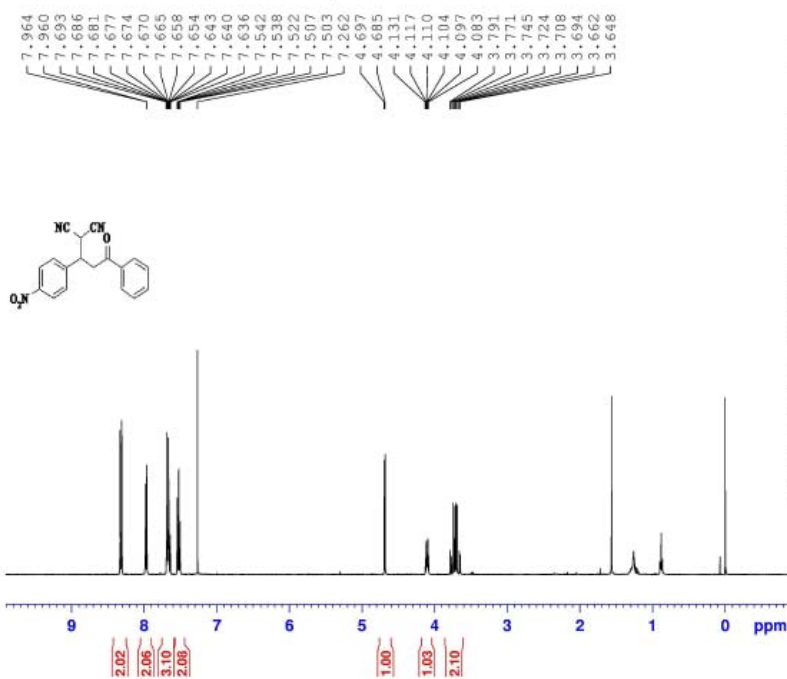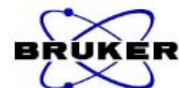

Current Data Parameters  
NAME 2009-03-03 shi jian 2-1  
EXPRNO 1  
PROCNO 1

F2 - Acquisition Parameters  
Date\_ 20090303  
Time 10.31  
INSTRUM spect  
PROBHD 5 mm FABS0 BG-  
PULPROG zgpg30  
LV 45236  
SOLVENT CDCl3  
NS 14  
DS 0  
SWH 8223.680 Hz  
FIDRES 0.120463 Hz  
AQ 3.9846387 sec  
RG 90.5  
WDW EM  
SSB 0  
LB 8.50 usec  
TE 295.0 K  
SI 1.0000000 sec  
TD 1

----- CHANNEL f1 -----  
NUC1 1H  
P1 12.00 usec  
PL1 -2.00 dB  
SFO1 400.1326710 MHz

F2 - Processing parameters  
SI 32768  
SF 400.1326000 MHz  
WDW EM  
SSB 0  
LB -0.20 Hz  
GB 0  
PC 1.00



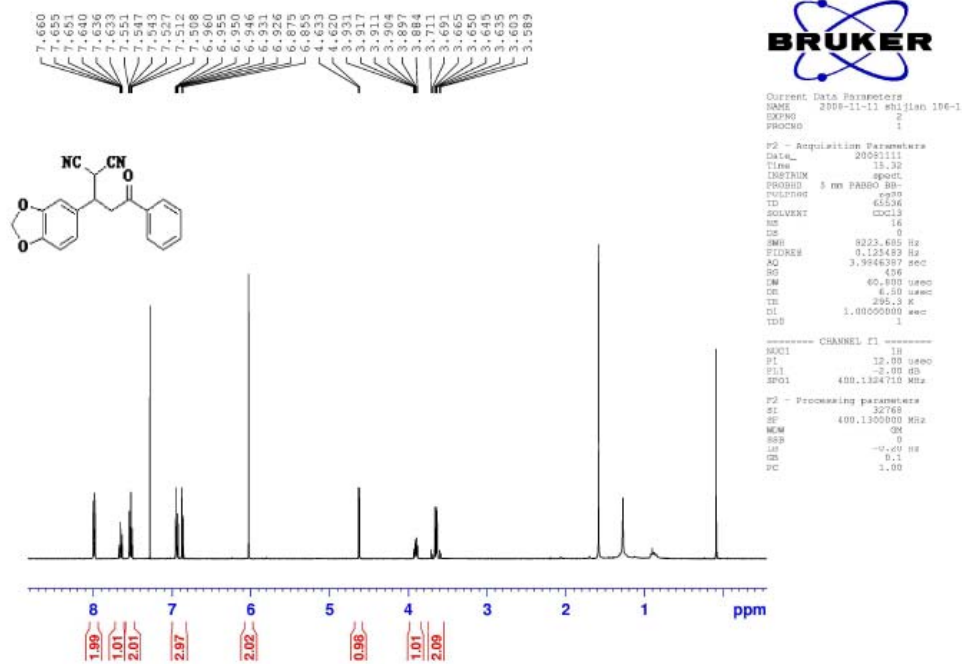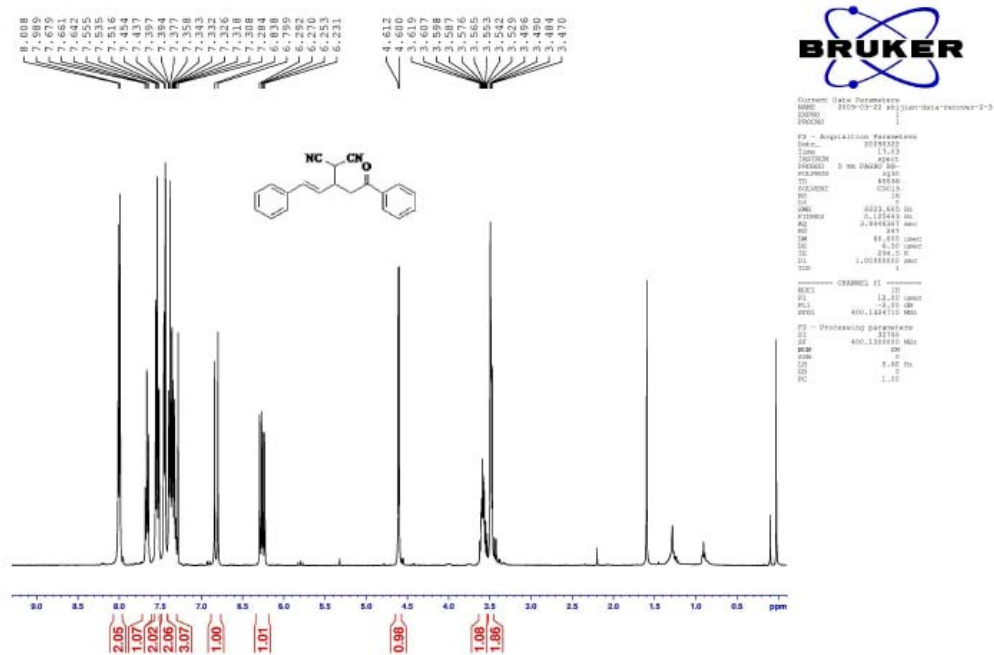

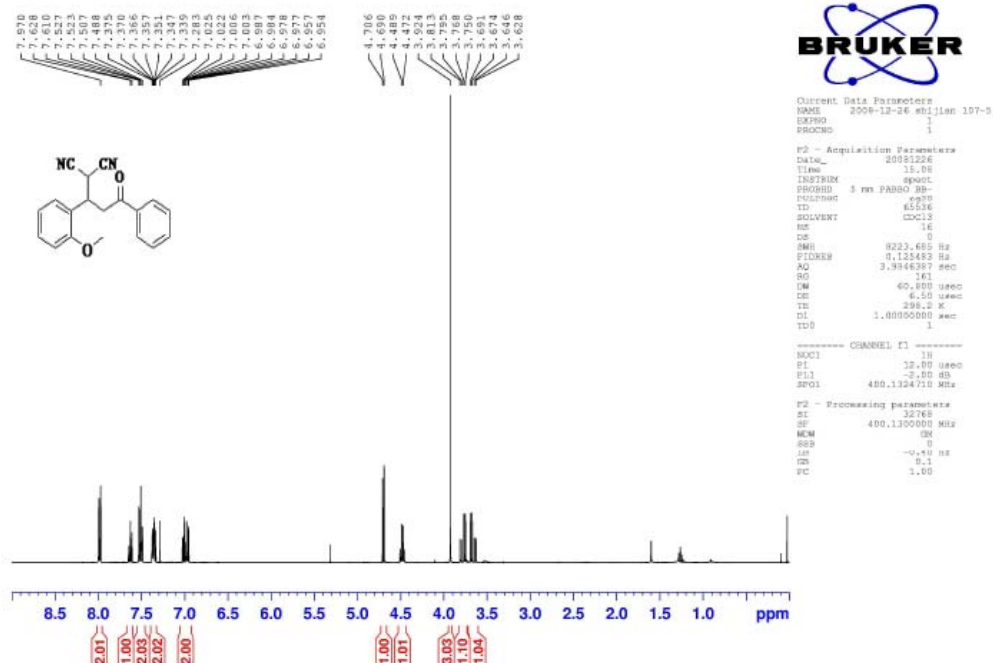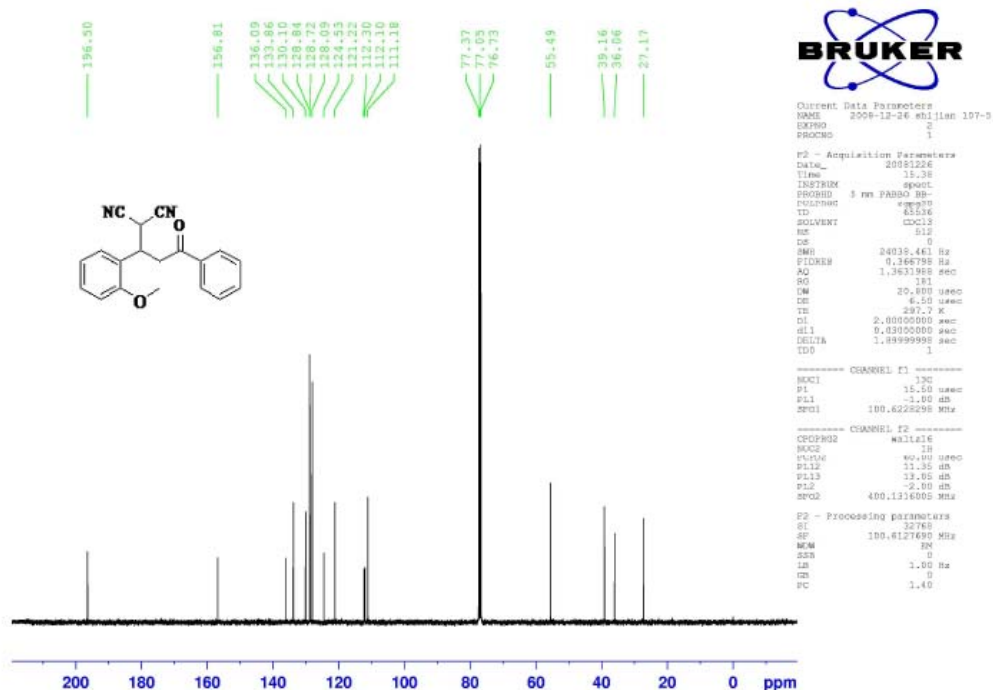

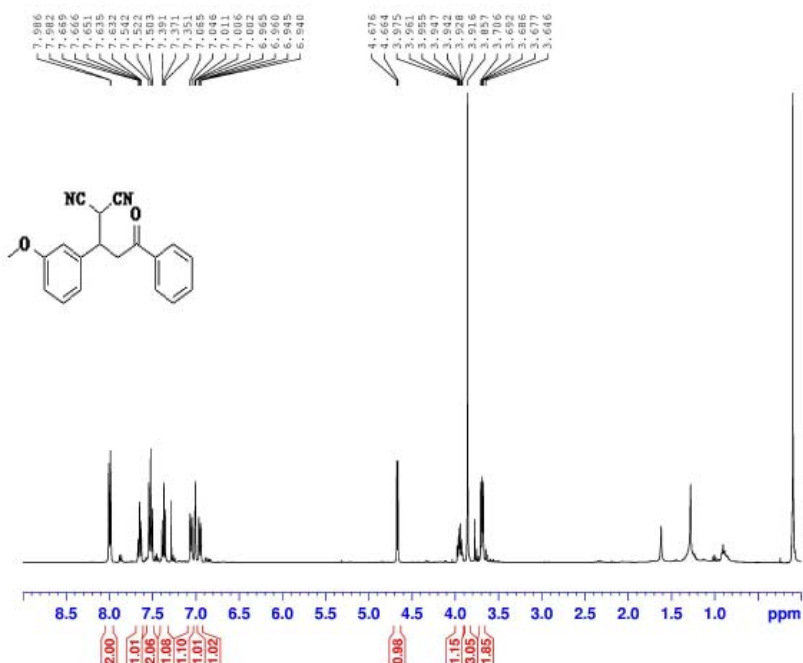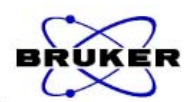

```

Current Data Parameters
NAME: 2009-11-22 sh11an-107-1
EXPNO: 1
PROCNO: 1

F2 - Acquisition Parameters
Date_ 20091122
Time 15.40
INSTRUM spect
PROBHD 5 mm F400 9H
PULPROG zgpg30
TD 65536
SOLVENT CDCl3
NS 16
DS 0
SWH 9223.685 Hz
FIDRES 0.115482 Hz
AQ 3.9346387 sec
RG 1.0
DM 60.000 usec
DE 6.50 usec
TE 295.1 K
D1 1.80000000 sec
TD0 1

----- CHANNEL f1 -----
NUC1 13
P1 12.00 usec
PL1 -2.00 dB
SFO1 400.1324710 MHz

F2 - Processing parameters
SI 32768
SF 400.1300000 MHz
MCW 2M
SSB 0
IB 0.60 Hz
GB 0
PC 1.00
    
```

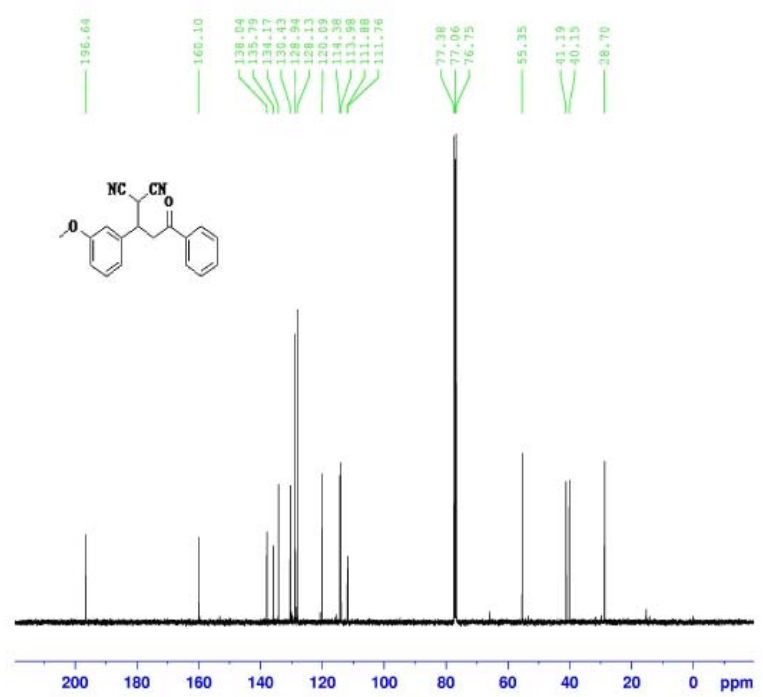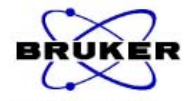

```

Current Data Parameters
NAME: 2009-12-15 holling-12-11-4
EXPNO: 1
PROCNO: 1

F2 - Acquisition Parameters
Date_ 20091216
Time 12.52
INSTRUM spect
PROBHD 5 mm F400 9H
PULPROG zgpg30
TD 65536
SOLVENT CDCl3
NS 16
DS 0
SWH 20379.461 Hz
FIDRES 0.236798 Hz
AQ 1.3631998 sec
RG 1.0
DM 20.000 usec
DE 6.50 usec
TE 295.2 K
D1 2.0000000 sec
DELTA 0.0000000 sec
TD0 1

----- CHANNEL f1 -----
NUC1 13C
P1 15.00 usec
PL1 -1.00 dB
SFO1 100.6224200 MHz

----- CHANNEL f2 -----
CPDPRG2 waltz16
NUC2 1H
P2 60.00 usec
PL2 11.70 dB
PL12 11.70 dB
PL3 -2.00 dB
SFO2 400.1314000 MHz

F2 - Processing parameters
SI 32768
SF 100.6127690 MHz
MCW 2M
SSB 0
IB 1.00 Hz
GB 0
PC 1.00
    
```

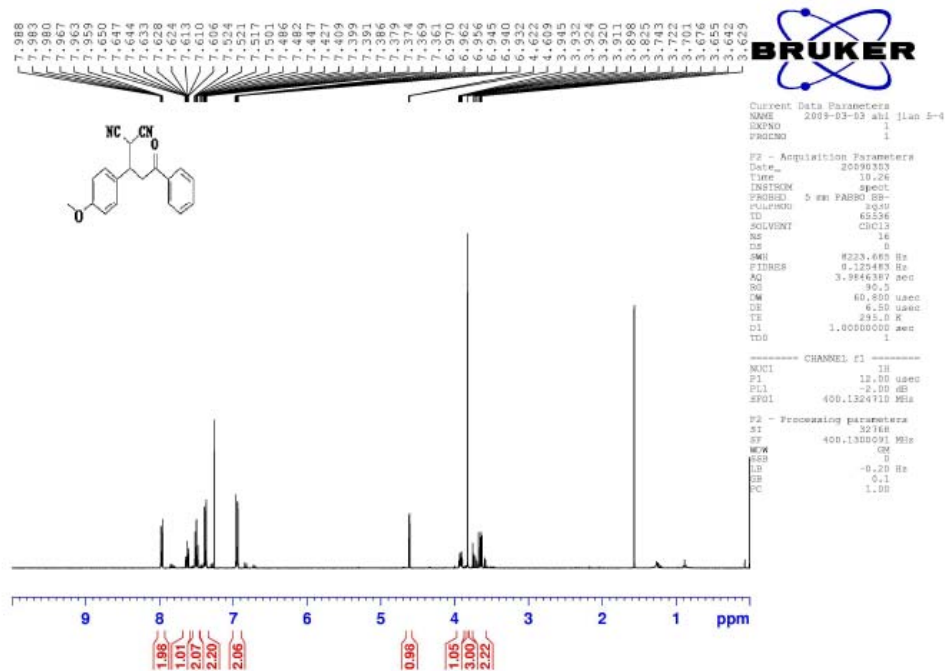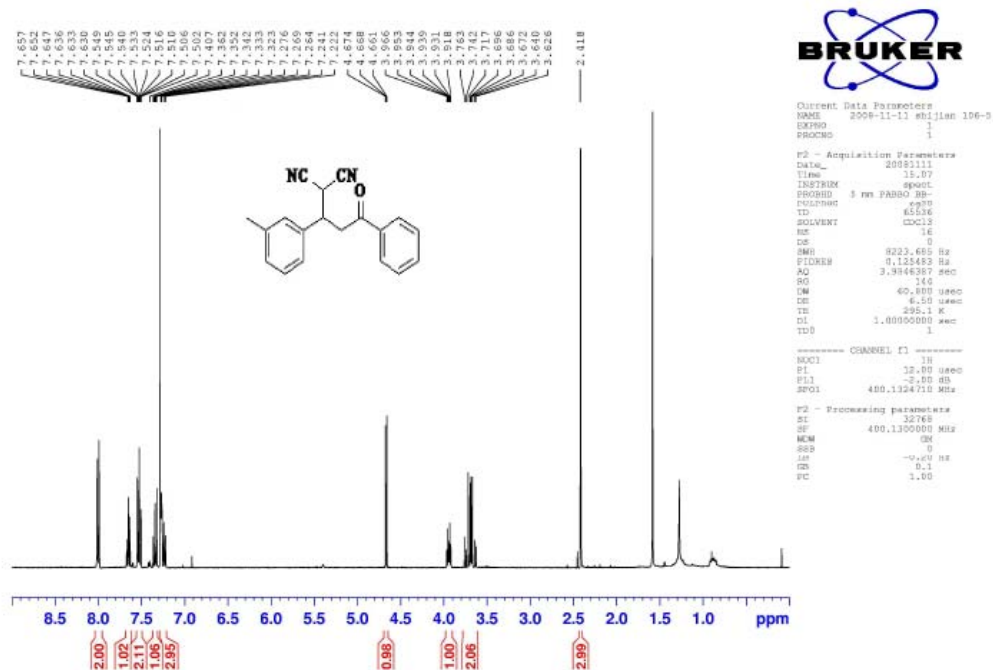

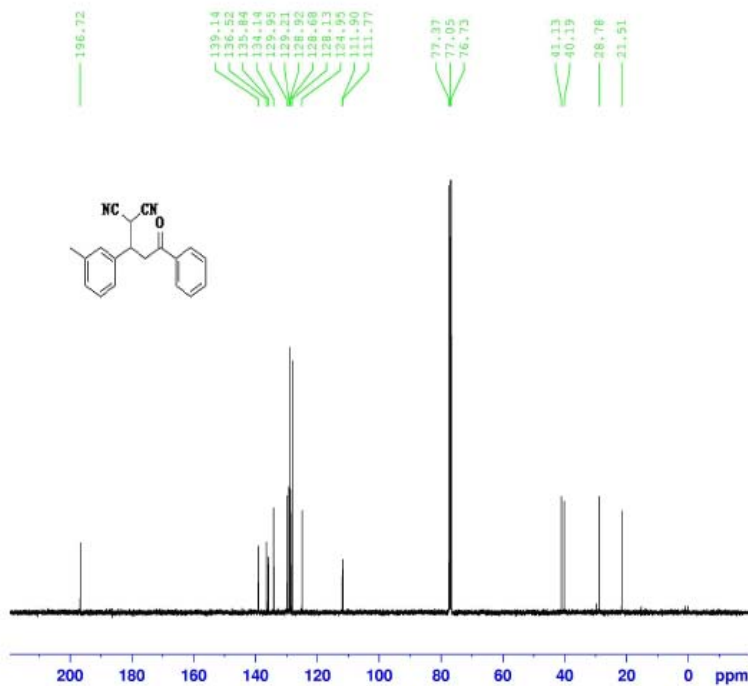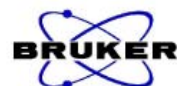

Current Data Parameters  
 NAME 2008-12-19 zhangko 106-5  
 EXPNO 1  
 PROCNO 1

F2 - Acquisition Parameters  
 Date\_ 20081219  
 Time 17.26  
 INSTRUM spect  
 PROBHD 3 mm PABBO BB-  
 PULPROG zgpg30  
 ID 6536  
 SOLVENT DMSO-d6  
 NS 512  
 DS 0  
 SFR 24039.441 Hz  
 FIDRES 0.166796 Hz  
 AQ 1.3631968 sec  
 RG 181  
 EM 20.800 usec  
 DE 6.50 usec  
 TE 297.2 K  
 DL 2.0000000 sec  
 dL1 0.0300000 sec  
 DELTA 1.8999999 sec  
 TDS 1

----- CHANNEL f1 -----  
 NUC1 13C  
 PL 18.00 usec  
 P11 -1.00 dB  
 SFO1 100.623376 MHz

----- CHANNEL f2 -----  
 CPDPRG2 waltz16  
 NUC2 1H  
 PCPD2 60.00 usec  
 P112 11.35 dB  
 P113 13.00 dB  
 P12 -2.00 dB  
 P13 400.131600 MHz

F2 - Processing parameters  
 SI 32768  
 SF 100.6127690 MHz  
 MW EM  
 SSB 0  
 LB 1.00 Hz  
 GB 0  
 PC 1.40

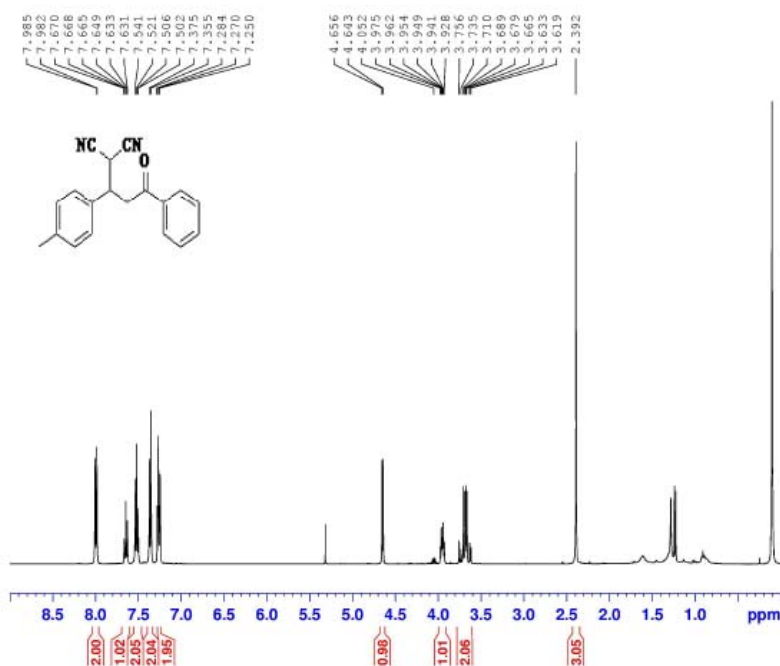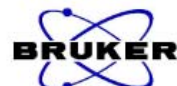

Current Data Parameters  
 NAME 2008-11-22 shijian-107-6  
 EXPNO 1  
 PROCNO 1

F2 - Acquisition Parameters  
 Date\_ 20081122  
 Time 15.51  
 INSTRUM spect  
 PROBHD 3 mm PABBO BB-  
 PULPROG zgpg  
 ID 6536  
 SOLVENT DMSO-d6  
 NS 16  
 DS 0  
 SFR 8223.605 Hz  
 FIDRES 0.125482 Hz  
 AQ 3.9946387 sec  
 RG 140  
 EM 40.800 usec  
 DE 6.50 usec  
 TE 295.1 K  
 DL 1.0000000 sec  
 TDS 1

----- CHANNEL f1 -----  
 NUC1 1H  
 PL 12.00 usec  
 P11 -2.00 dB  
 SFO1 400.1324710 MHz

F2 - Processing parameters  
 SI 32768  
 SF 400.1300000 MHz  
 MW EM  
 SSB 0  
 LB 0.00 Hz  
 GB 0  
 PC 1.00



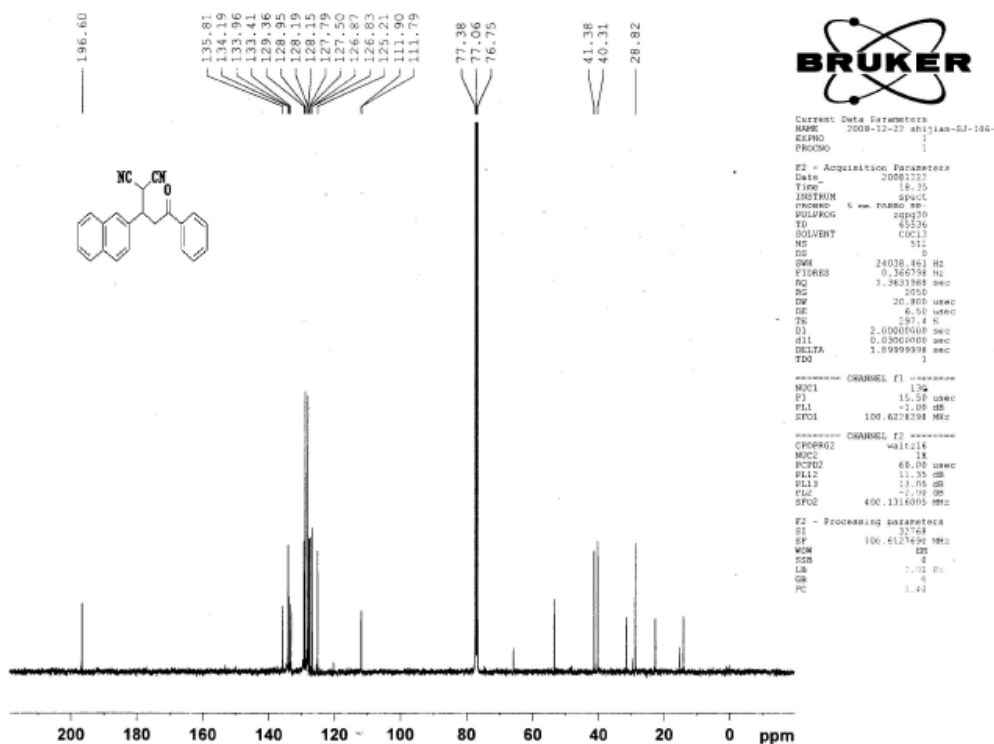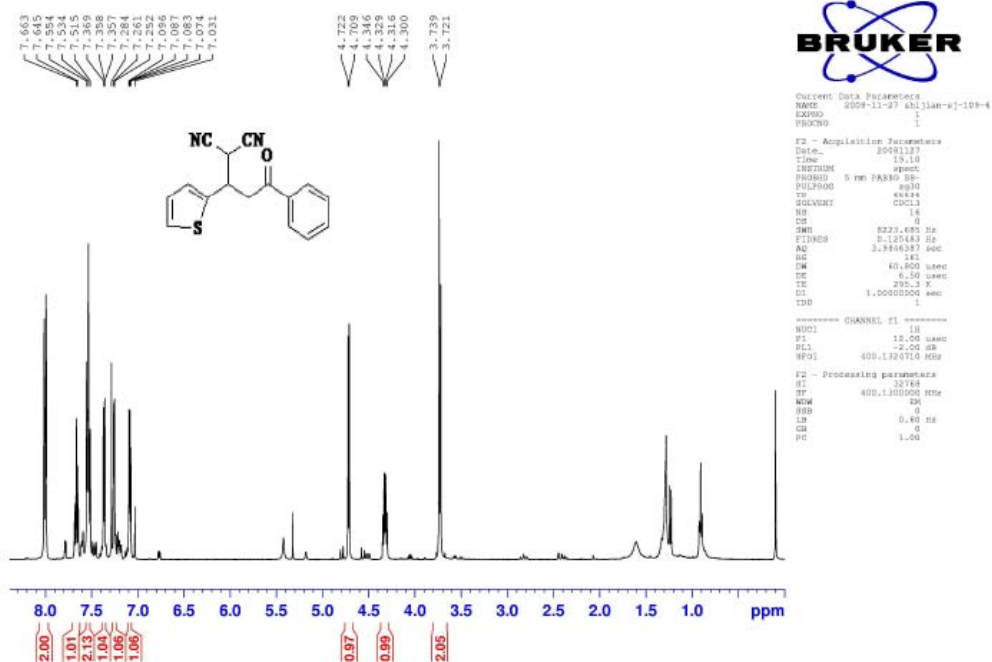

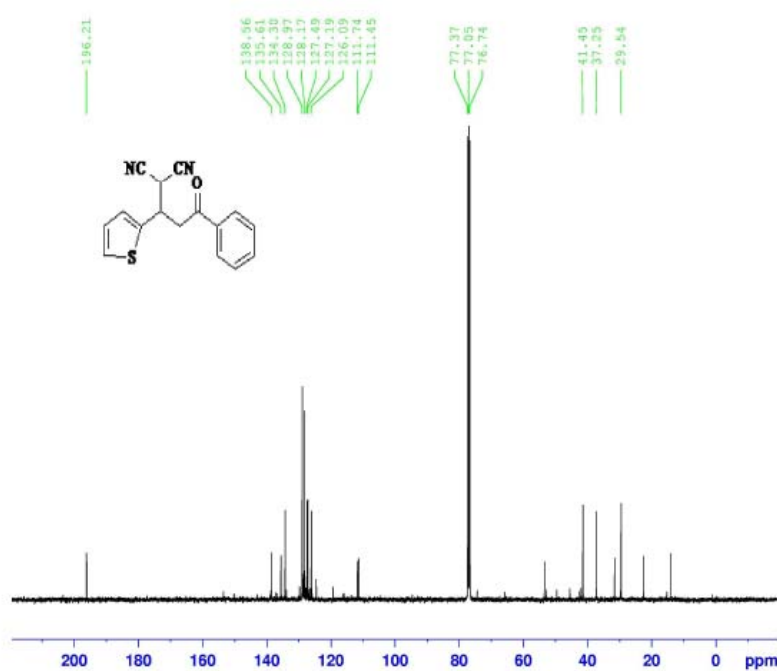

Current Data Parameters  
NAME 2009-12-23 sh11an-SI-109-4  
EXNO 1  
PROCNO 1

F2 - Acquisition Parameters  
Date\_ 20091223  
Time 3.53  
INSTRUM spect  
PROBHD 5 mm PAK60 BBI  
PULPROG zgpg30  
TD 65536  
SOLVENT DMSO  
NS 0  
DS 0  
SWH 24038.481 Hz  
FIDRES 0.384798 Hz  
AQ 1.3131988 sec  
RG 2000  
CW 30.4000 usec  
TE 297.2 K  
DE 6.50 usec  
DI 2.0000000 sec  
d11 2.0000000 sec  
DELTA 1.8999998 sec  
TD 0

----- CHANNEL F1 -----  
NUC1 13C  
P1 15.50 usec  
PL1 -1.00 dB  
SFO1 100.6222288 MHz

----- CHANNEL F2 -----  
CPDPRG2 waltz16  
NUC2 1H  
PCPD2 60.00 usec  
PL2 11.50 dB  
PL12 13.00 dB  
PL13 -3.00 dB  
SFO2 400.1316009 MHz

F2 - Processing parameters  
SI 32768  
SF 100.6174980 MHz  
WDW EM  
SSB 0  
LB 2.00 Hz  
GB 0  
PC 1.40

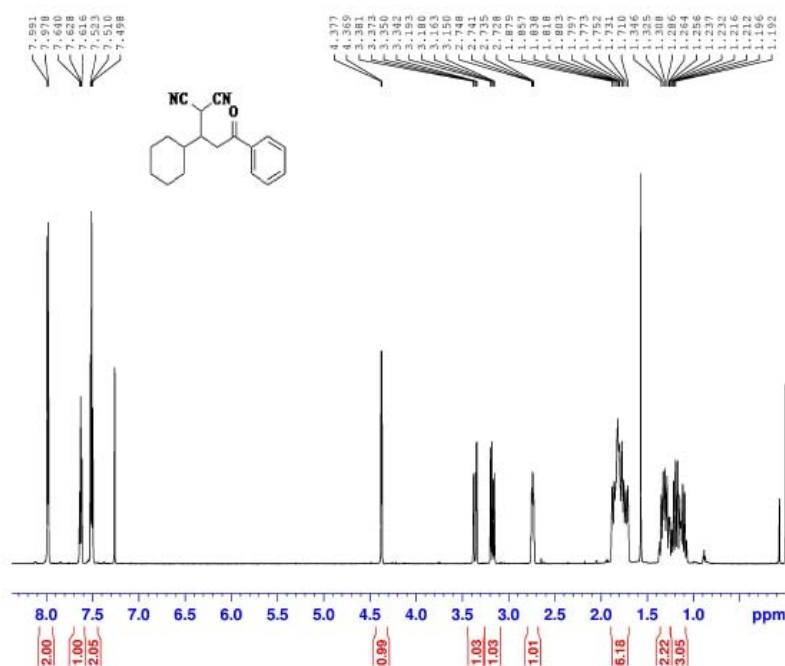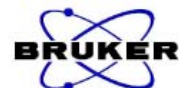

Current Data Parameters  
NAME 2009-03-10 shengta-SI-2F-1  
EXNO 1  
PROCNO 1

F2 - Acquisition Parameters  
Date\_ 20090310  
Time 14.48  
INSTRUM spect  
PROBHD 5 mm PAK60 BBI  
PULPROG zgpg30  
TD 65536  
SOLVENT DMSO  
NS 0  
DS 0  
SWH 12185.424 Hz  
FIDRES 0.188025 Hz  
AQ 2.4564426 sec  
RG 64  
CW 40.032 usec  
TE 297.2 K  
DE 6.50 usec  
DI 1.0000000 sec  
TD 0

----- CHANNEL F1 -----  
NUC1 1H  
P1 7.20 usec  
PL1 -1.00 dB  
SFO1 400.1327060 MHz

F2 - Processing parameters  
SI 32768  
SF 400.130085 MHz  
WDW EM  
SSB 0  
LB 0.30 Hz  
GB 0  
PC 1.00



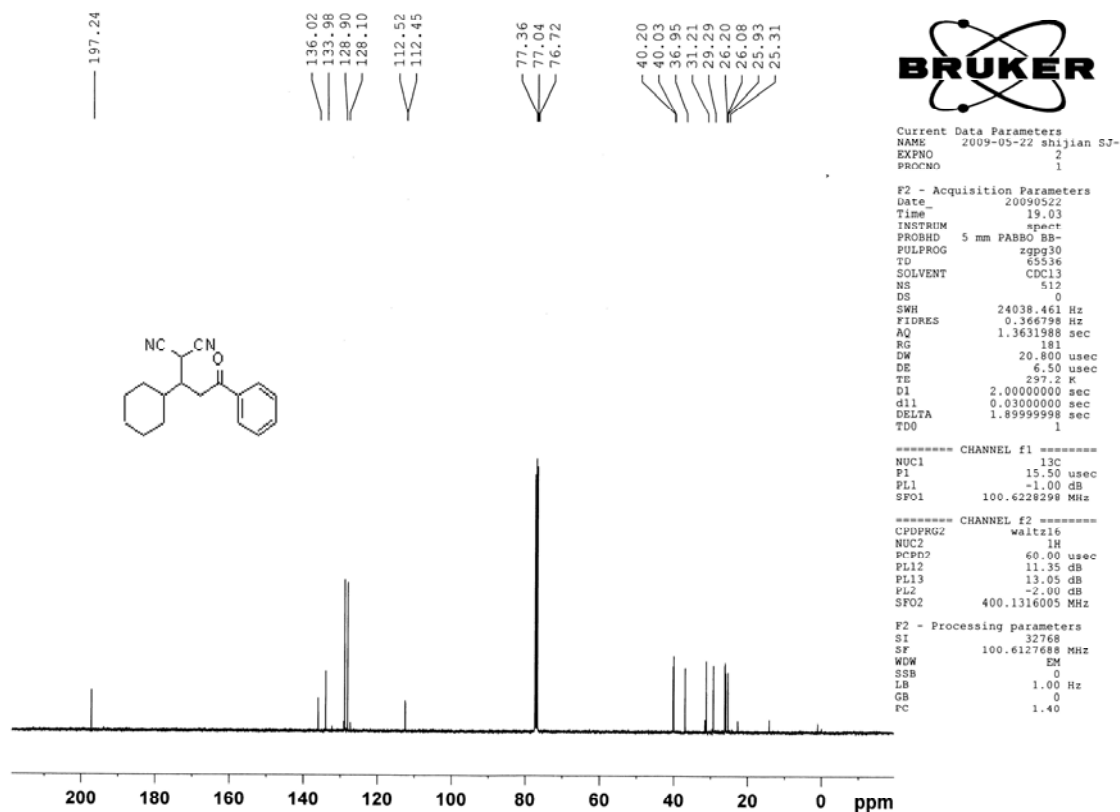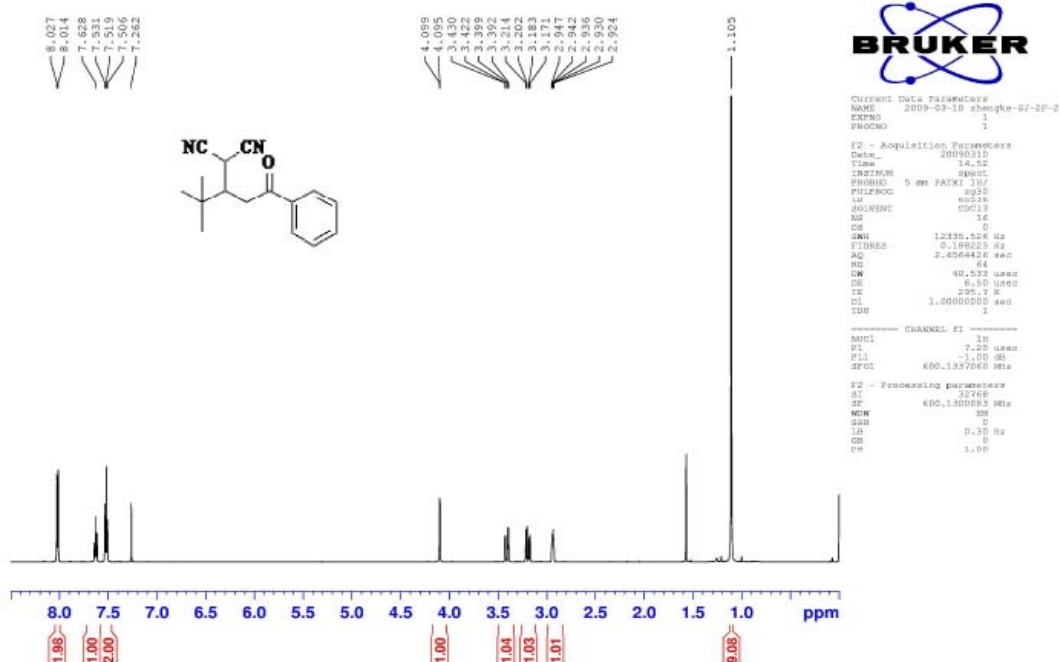

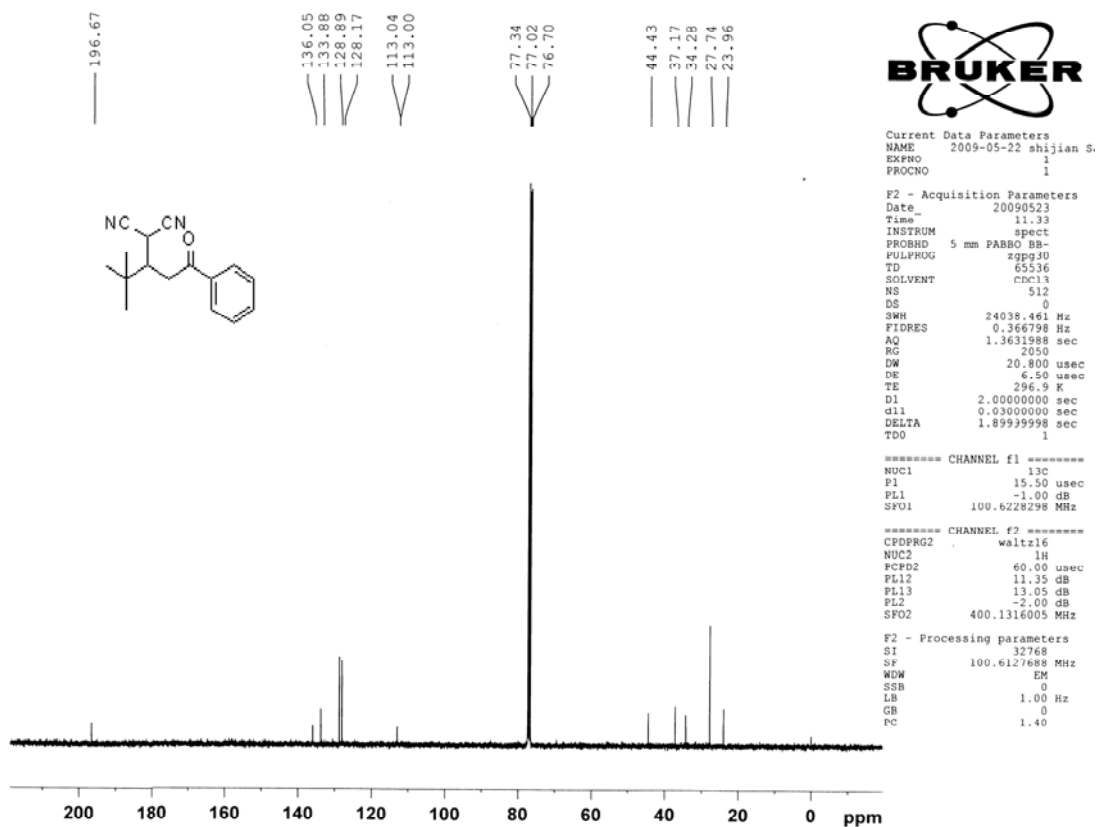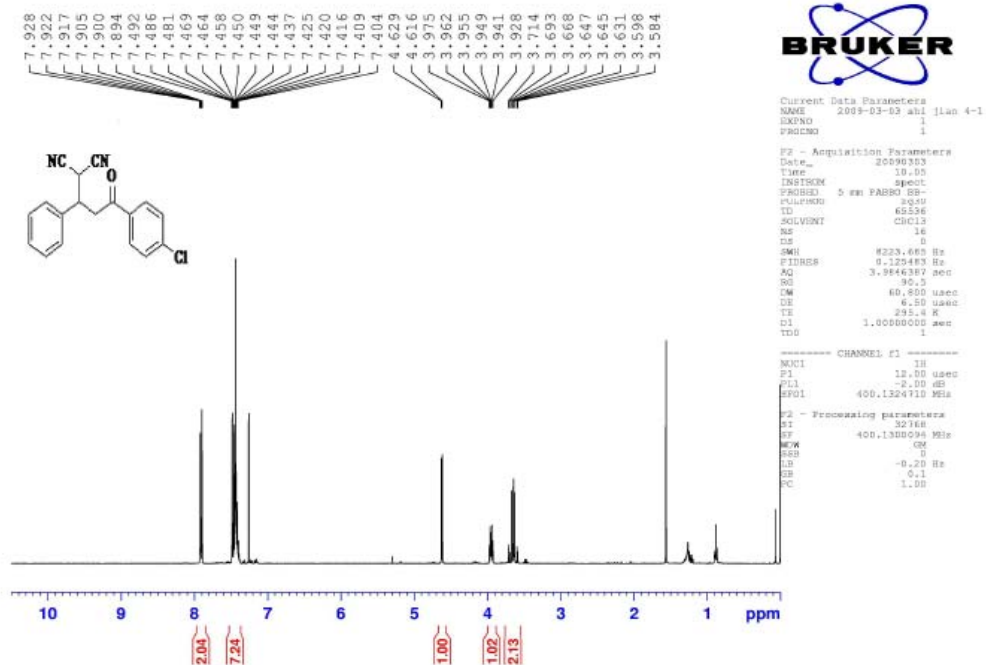

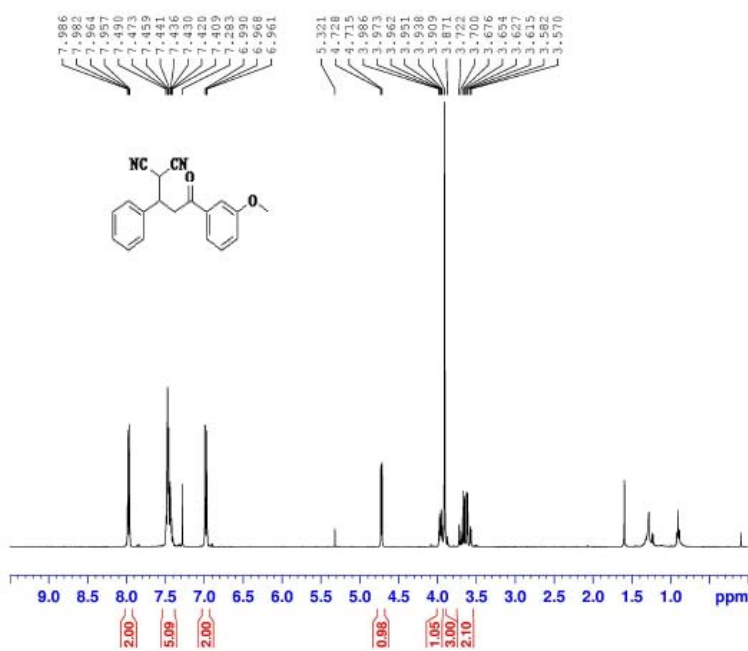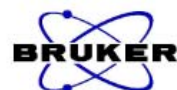

Current Data Parameters  
NAME 2009-11-27 shijian-e]-109-4  
EXPNO 1  
PROCNO 1

F2 - Acquisition Parameters  
Date\_ 20091127  
Time 15.00  
INSTRUM spect  
PROBHD 5 mm PABBO BB-  
PULPROG zgpg30  
TD 65536  
SOLVENT CDCl3  
NS 16  
DS 0  
SWH 8223.655 Hz  
FIDRES 0.125483 Hz  
AQ 3.9946387 sec  
RG 161  
WM 40.800 usec  
DE 6.50 usec  
TE 298.2 K  
D1 1.0000000 sec  
TD0 1

===== CHANNEL f1 =====  
NUC1 1H  
P1 12.00 usec  
PL1 -2.00 dB  
SFO1 400.1324710 MHz

F2 - Processing parameters  
SI 32768  
SF 400.1300000 MHz  
WDW EM  
SSB 0  
LB 0.60 Hz  
GB 0  
PC 1.00

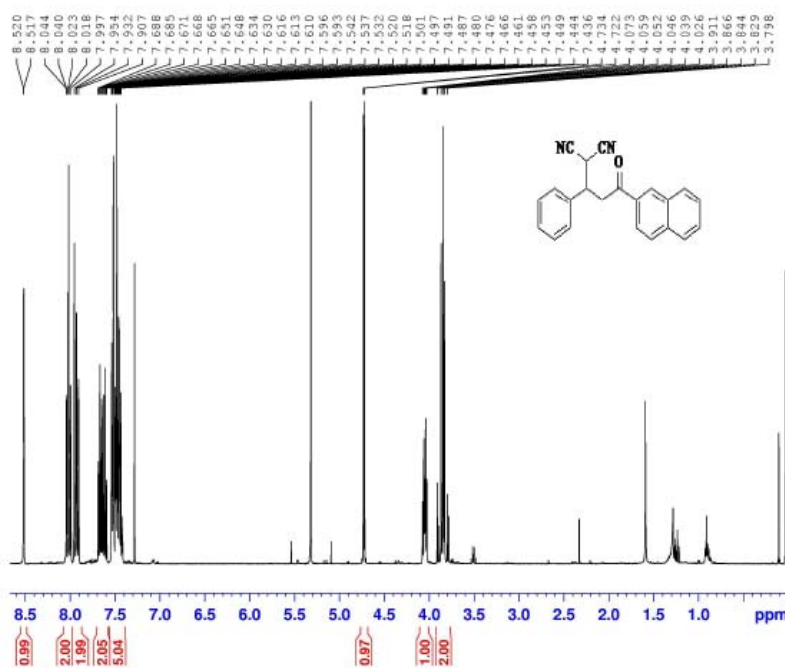

Current Data Parameters  
NAME 2009-12-26 shijian 107-2  
EXPNO 1  
PROCNO 1

F2 - Acquisition Parameters  
Date\_ 20091226  
Time 15.58  
INSTRUM spect  
PROBHD 5 mm PABBO BB-  
PULPROG zgpg30  
TD 65536  
SOLVENT CDCl3  
NS 16  
DS 0  
SWH 8223.655 Hz  
FIDRES 0.125483 Hz  
AQ 3.9946387 sec  
RG 161  
WM 40.800 usec  
DE 6.50 usec  
TE 298.2 K  
D1 1.0000000 sec  
TD0 1

===== CHANNEL f1 =====  
NUC1 1H  
P1 12.00 usec  
PL1 -2.00 dB  
SFO1 400.1324710 MHz

F2 - Processing parameters  
SI 32768  
SF 400.1300000 MHz  
WDW EM  
SSB 0  
LB 0.60 Hz  
GB 0  
PC 1.00

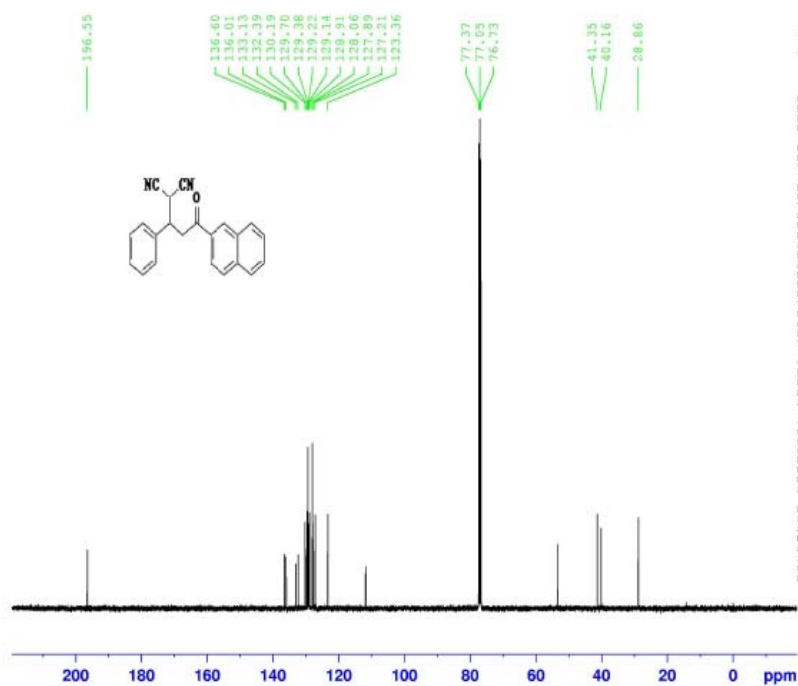

```
Current Data Parameters
NAME 2008-12-26 est11an 157-2
EXPNO 2
PROCNO 1

F2 - Acquisition Parameters
Date_ 20081226
Time 16.27
INSTRUM spect
PROBHD 5 mm PABBO BB-
PULPROG zgpg30
TD 65536
SOLVENT CDCl3
NS 0
DS 0
SFO 300.136000 MHz
AQ 0.166758 Hz
RG 1.3631958 sec
RG 101
SM 20.000 usec
DE 6.50 usec
TE 297.2 K
D1 2.00000000 sec
d11 0.03000000 sec
DELTA 1.99999999 sec
TD0 1

----- CHANNEL f1 -----
NUC1 13C
P1 15.00 usec
PL1 -1.00 dB
SFO1 100.625298 MHz

----- CHANNEL f2 -----
CPCPRG2 waltz16
NUC2 1H
PULSE2 zgpg30
PL12 11.35 dB
PL13 33.05 dB
PL2 -2.00 dB
SFO2 400.136000 MHz

F2 - Processing parameters
SI 32768
SF 100.6127690 MHz
SF 400.136000 MHz
WDW EM
SSB 0
LB 1.00 Hz
GB 0
CB 0
PC 1.40
```

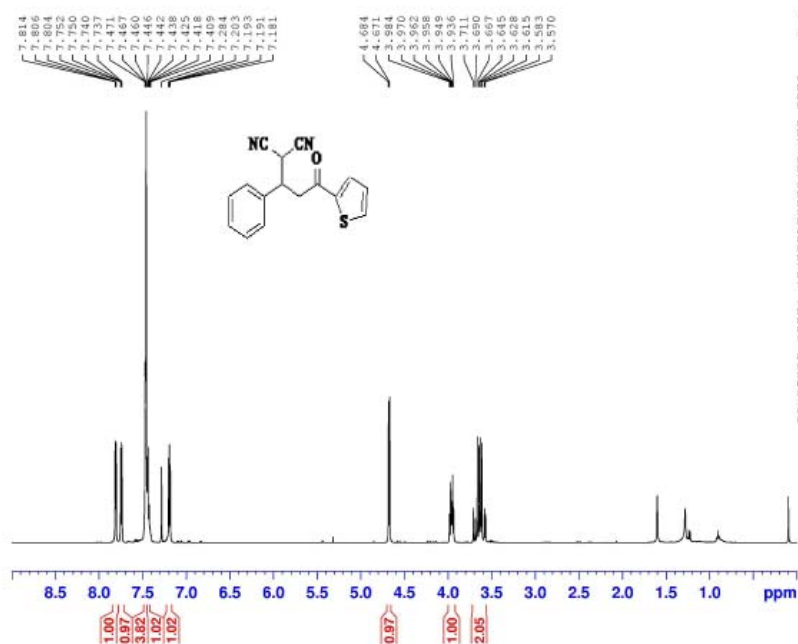

```
Current Data Parameters
NAME 2008-11-27 est11an-sj-108-2
EXPNO 1
PROCNO 1

F2 - Acquisition Parameters
Date_ 20081127
Time 15.58
INSTRUM spect
PROBHD 5 mm PABBO BB-
PULPROG zgpg30
TD 65536
SOLVENT CDCl3
NS 14
DS 0
SFO 300.136000 MHz
AQ 0.166758 Hz
RG 1.3631958 sec
RG 101
SM 20.000 usec
DE 6.50 usec
TE 295.4 K
D1 1.00000000 sec
TD0 1

----- CHANNEL f1 -----
NUC1 1H
P1 12.00 usec
PL1 -2.00 dB
SFO1 400.136000 MHz

F2 - Processing parameters
SI 32768
SF 100.6127690 MHz
SF 400.136000 MHz
WDW EM
SSB 0
LB 0.40 Hz
GB 0
CB 0
PC 1.00
```

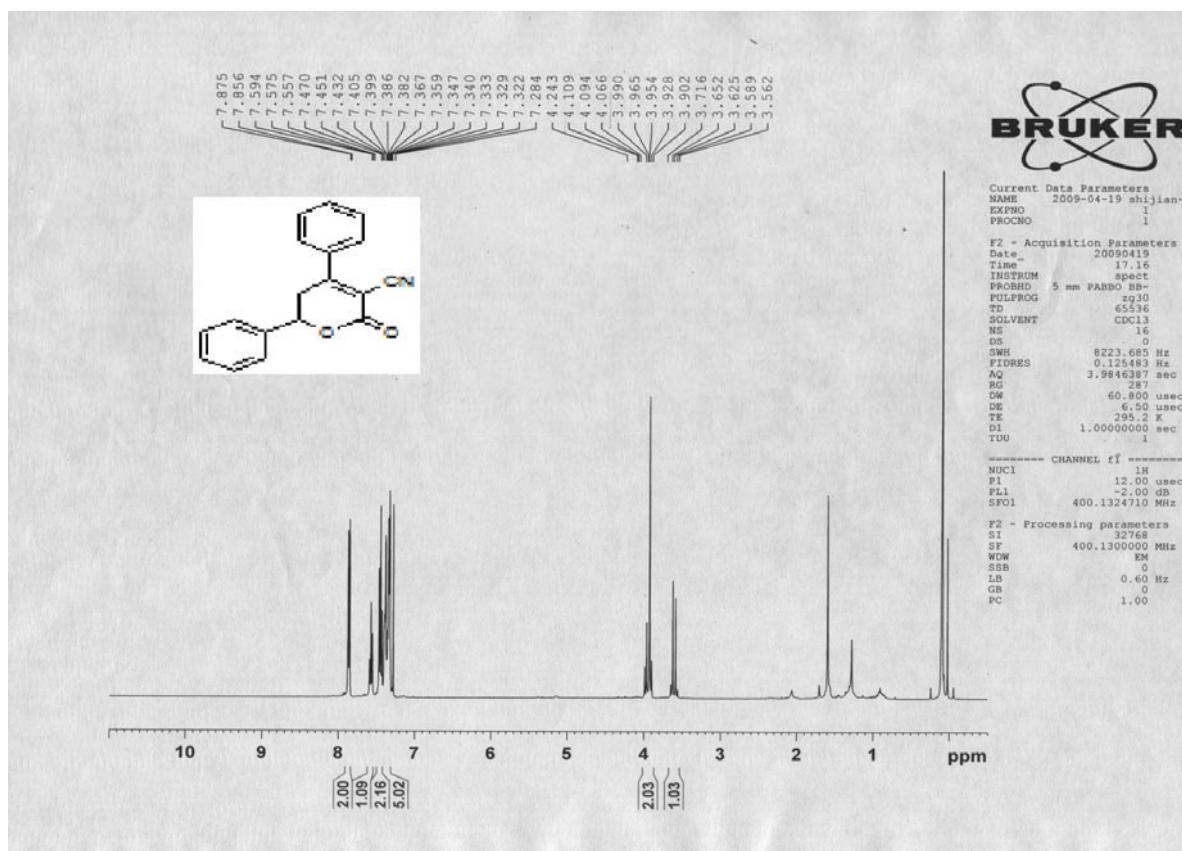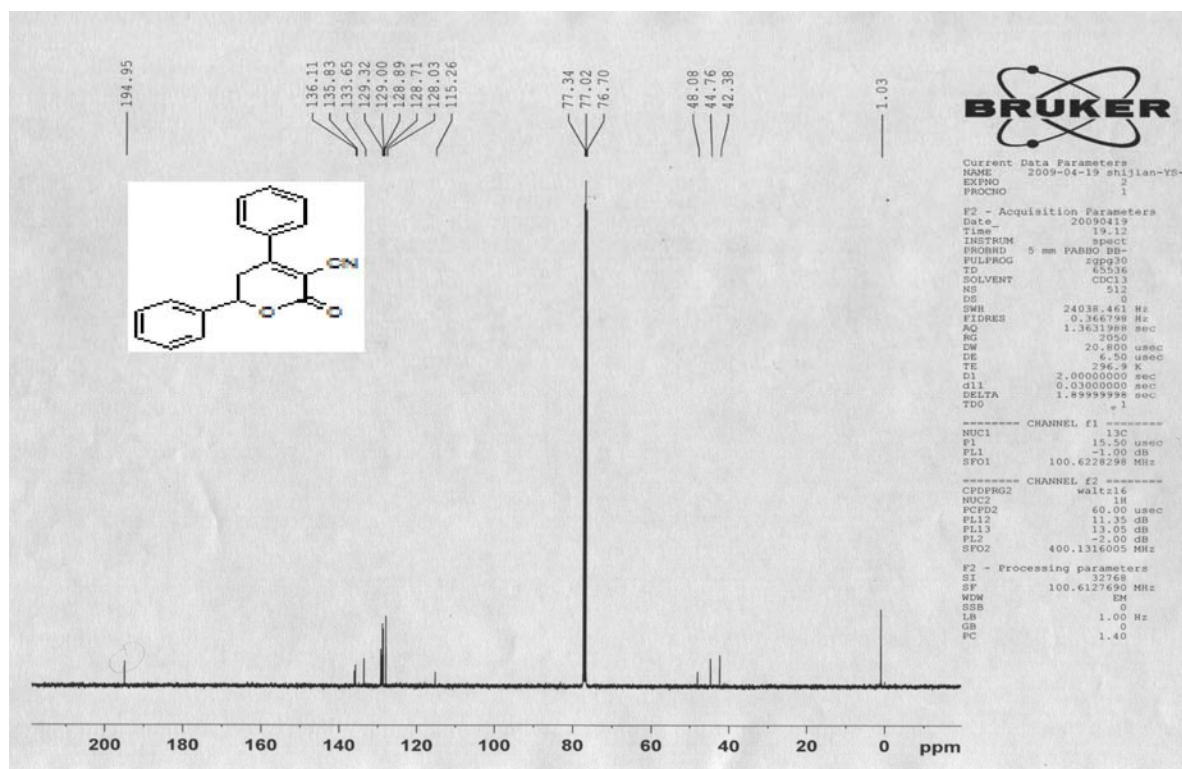

## (J) References

- 1 (a) *Vogel's Textbook of Practical Organic Chemistry* (ELBS), 5th ed.; Longman: UK, 1989; p 1034; (b) A. Isleyen and ö.Dogan, *Tetrahedron: Asymmetry*, 2007, **18**, 679.
- 2 (a) E. Solcaniova and S. Toma, *Org. Mag. Res.*, 1980, **14**, 138; (b) K. Hino, Y. Nagai, H. Uno, Y. Masuda, M. Oka and T. Karasawa, *J. Med. Chem.*, 1988, **31**, 107; (c) H. Xian, X. Linghong and I. N. Hong, *J. Org. Chem.*, 1988, **53**, 4862; (d) J. Huang and Y.-Z. Huang, *J. Organomet. Chem.*, 1991, **414**, 49; (e) D. S. Noyce and M. J. Jorgenson, *J. Am. Chem. Soc.*, 1962, **84**, 4312; (f) B. C. Ranu and R. J. Jana, *Org. Chem.*, 2005, **70**, 8621; (g) S. N. Lopez, M. V. Castelli, S. A. Zacchino, J. N. Dominguez, G. Lobo, J. Charris-Charris, J. C. G. Cortes, J. C. Ribas, C. Devia, A. M. Rodriguez and R. D. Enriz, *Bioorg. Med. Chem.*, 2001, **9**, 1999; (h) P. Peach, D. J. Cross, J. A. Kenny, I. Mann, I. Houson, L. Campbell, T. Walsgroveb and M. Wills, *Tetrahedron*, 2006, **62**, 1864; (i) J. M. Concello, P. L. Bernad, M. Huerta, S. Garcia-Granda and M. R. Diaz, *Chem. Eur. J.*, 2003, **9**, 5343; (j) D. Huang, J.-X. Wang, Y. Hu, Y. Zhang and J. Tang, *Synth. Commun.*, 2002, **32**, 971; (k) J. Wu, D. Zhang and S. Wei, *Synth. Commun.*, 2005, **35**, 1213.
- 3 a) M. Quinteiro, C. Seoane and J. L. Soto, *J. Heterocyclic. Chem.*, 1978, **15**, 57; b) D. V. Tyndall, T. A. Nakib and M. J. Meegan, *Tetrahedron Lett.*, 1988, **29**, 2703.
